# Supplementary material for: DNMTi/HDACi combined epigenetic targeted treatment induces reprogramming of myeloma cells in the direction of normal plasma cells
Source: PubMed Central journal article supplement — Br J Cancer. 2018 Mar 2;118(8):1062–73. doi: 10.1038/s41416-018-0025-x (PMC5931098; doi:10.1038/s41416-018-0025-x), 2018-03-02
Supplement: 41416_2018_25_MOESM3_ESM.pdf [file 41416_2018_25_MOESM3_ESM.pdf]

**TABLE S2: Genes overexpressed in decitabine/TSA treated HMCLs. Five HMCLs were cultured with or without 0.5  $\mu$ M decitabine for 7 days and with or without 0.33  $\mu$ M TSA for the last 24 hours. Gene expression was profiled with Affymetrix U133 plus 2.0 microarray. Genes significantly differentially expressed between control and decitabine + TSA treated cells were identified using SAM supervised paired analysis with a 5% false discovery rate.**

| Probeset                                                 | Gene     | Ratio | Banding     | Affymetrix description                                             |
|----------------------------------------------------------|----------|-------|-------------|--------------------------------------------------------------------|
| <b>Intercellular communication and membrane proteins</b> |          |       |             |                                                                    |
| 205997_at                                                | ADAM28   | 27.0  | 8p21.2      | ADAM metallopeptidase domain 28                                    |
| 201952_at                                                | ALCAM    | 16.4  | 3q13.1      | activated leukocyte cell adhesion molecule                         |
| 209462_at                                                | APLP1    | 24.5  | 19q13.1     | amyloid beta (A4) precursor-like protein 1                         |
| 211404_s_at                                              | APLP2    | 2.5   | 11q23-q25   | amyloid beta (A4) precursor-like protein 2                         |
| 205239_at                                                | AREG     | 24.1  | 4q13-q21    | amphiregulin (schwannoma-derived growth factor)                    |
| 217767_at                                                | C3       | 10.1  | 19p13.3-p13 | complement component 3                                             |
| 209906_at                                                | C3AR1    | 17.9  | 12p13.31    | complement component 3a receptor 1                                 |
| 204103_at                                                | CCL4     | 3.7   | 17q12       | chemokine (C-C motif) ligand 4                                     |
| 226545_at                                                | CD109    | 6.3   | 6q13        | CD109 antigen (Gov platelet alloantigens)                          |
| 216379_x_a                                               | CD24     | 15.5  | 6q21        | CD24 antigen (small cell lung carcinoma cluster 4 antigen)         |
| 229221_at                                                | CD44     | 3.2   | 11p13       | CD44 antigen (homing function and Indian blood group system)       |
| 213958_at                                                | CD6      | 8.8   | 11q13       | CD6 antigen                                                        |
| 203904_x_a                                               | CD82     | 3.2   | 11p11.2     | CD82 antigen                                                       |
| 204440_at                                                | CD83     | 3.8   | 6p23        | CD83 antigen (activated B lymphocytes; immunoglobulin superfamily) |
| 201005_at                                                | CD9      | 15.2  | 12p13.3     | CD9 antigen (p24)                                                  |
| 201131_s_at                                              | CDH1     | 107.5 | 16q22.1     | cadherin 1; type 1; E-cadherin (epithelial)                        |
| 213800_at                                                | CFH      | 7.9   | 1q32        | complement factor H                                                |
| 221698_s_at                                              | CLEC7A   | 9.5   | 12p13.2-p12 | C-type lectin domain family 7; member A                            |
| 1556499_s_c                                              | COL1A1   | 11.6  | 17q21.3-q22 | collagen; type I; alpha 1                                          |
| 202403_s_at                                              | COL1A2   | 5.4   | 7q22.1      | collagen; type I; alpha 2                                          |
| 205898_at                                                | CX3CR1   | 5.2   | 3p21 3p21.3 | chemokine (C-X3-C motif) receptor 1                                |
| 208779_x_a                                               | DDR1     | 2.7   | 6p21.3      | discoidin domain receptor family; member 1                         |
| 226281_at                                                | DNER     | 15.3  | 2q36.3      | delta-notch-like EGF repeat-containing transmembrane               |
| 202668_at                                                | EFNB2    | 5.2   | 13q33       | ephrin-B2                                                          |
| 225078_at                                                | EMP2     | 7.4   | 16p13.2     | epithelial membrane protein 2                                      |
| 213506_at                                                | F2RL1    | 158.2 | 5q13        | coagulation factor II (thrombin) receptor-like 1                   |
| 201579_at                                                | FAT      | 14.1  | 4q35        | FAT tumor suppressor homolog 1 (Drosophila)                        |
| 212464_s_at                                              | FN1      | 79.4  | 2q34        | fibronectin 1                                                      |
| 204222_s_at                                              | GLI1     | 3.2   | 12q21.1     | glioma pathogenesis-related 1 (glioma)                             |
| 231166_at                                                | GPR155   | 4.2   | 2q31.1      | G protein-coupled receptor 155                                     |
| 229055_at                                                | GPR68    | 5.8   | 14q31       | G protein-coupled receptor 68                                      |
| 200696_s_at                                              | GSN      | 7.6   | 9q33        | gelsolin (amyloidosis; Finnish type)                               |
| 217478_s_at                                              | HLA-DMA  | 2.6   | 6p21.3      | major histocompatibility complex; class II; DM alpha               |
| 203932_at                                                | HLA-DMB  | 4.2   | 6p21.3      | major histocompatibility complex; class II; DM beta                |
| 211990_at                                                | HLA-DPA1 | 7.6   | 6p21.3      | major histocompatibility complex; class II; DP alpha 1             |
| 201137_s_at                                              | HLA-DPB1 | 5.5   | 6p21.3      | major histocompatibility complex; class II; DP beta 1              |
| 212671_s_at                                              | HLA-DQA1 | 6.5   | 6p21.3      | major histocompatibility complex; class II; DQ alpha 1             |
| 212998_x_a                                               | HLA-DQB1 | 18.5  | 6p21.3      | major histocompatibility complex; class II; DQ beta 1              |
| 208894_at                                                | HLA-DRA  | 7.9   | 6p21.3      | major histocompatibility complex; class II; DR alpha               |
| 215193_x_a                                               | HLA-DRB1 | 4.1   | 6p21.3      | major histocompatibility complex; class II; DR beta 1              |
| 208306_x_a                                               | HLA-DRB5 | 3.6   | 6p21.3      | Major histocompatibility complex; class II; DR beta 3              |
| 217362_x_a                                               | HLA-DRB6 | 4.4   | 6p21.3      | major histocompatibility complex; class II; DR beta 6 (pseudogene) |

|                            |          |           |                 |                                                                                                                    |
|----------------------------|----------|-----------|-----------------|--------------------------------------------------------------------------------------------------------------------|
| 219403_s_at                | HPSE     | 5.6       | 4q21.3          | heparanase                                                                                                         |
| 210095_s_at                | IGFBP3   | 5.3       | 7p13-p12        | insulin-like growth factor binding protein 3                                                                       |
| 206172_at                  | IL13RA2  | 32.9      | Xq13.1-q28      | interleukin 13 receptor; alpha 2                                                                                   |
| 203233_at                  | IL4R     | 3.5       | 16p11.2-12.     | interleukin 4 receptor                                                                                             |
| 216331_at                  | ITGA7    | 5.5       | 12q13           | integrin; alpha 7                                                                                                  |
| 207509_s_at                | LAIR2    | 4.9       | 19q13.4         | leukocyte-associated Ig-like receptor 2                                                                            |
| 205569_at                  | LAMP3    | 16.4      | 3q26.3-q27      | lysosomal-associated membrane protein 3                                                                            |
| 221581_s_at                | LAT2     | 4.3       | 7q11.23         | linker for activation of T cells family; member 2                                                                  |
| 200923_at                  | LGALS3BP | 18.2      | 17q25           | lectin; galactoside-binding; soluble; 3 binding protein                                                            |
| 208933_s_at                | LGALS8   | 14.0      | 1q42-q43        | lectin; galactoside-binding; soluble; 8 (galectin 8)                                                               |
| 225060_at                  | LRP11    | 40.4      | 6q25.1          | low density lipoprotein receptor-related protein 11                                                                |
| 235568_at                  | MCEMP1   | 12.3      | 19p13.2         | mast cell-expressed membrane protein 1                                                                             |
| 210605_s_at                | MFGE8    | 4.5       | 15q25           | milk fat globule-EGF factor 8 protein                                                                              |
| 212473_s_at                | MICAL2   | 11.3      | 11p15.3         | microtubule associated monooxygenase; calponin and LIM domain containing 2                                         |
| 205959_at                  | MMP13    | 221.2     | 11q22.3         | matrix metalloproteinase 13 (collagenase 3)                                                                        |
| 212509_s_at                | MXRA7    | 15.0      | 17q25.1         | matrix-remodelling associated 7                                                                                    |
| 203413_at                  | NELL2    | 6.2       | 12q13.11-q13.12 | NEL-like 2 (chicken)                                                                                               |
| 204105_s_at                | NRCAM    | 3.2       | 7q31.1-q31.2    | neuronal cell adhesion molecule                                                                                    |
| 214617_at                  | PRF1     | 36.7      | 10q22           | perforin 1 (pore forming protein)                                                                                  |
| 212646_at                  | RAFTLIN  | 3.3       | 3p25.1-p24.1    | raft-linking protein                                                                                               |
| 212158_at                  | SDC2     | 26.3      | 8q22-q23        | syndecan 2 (heparan sulfate proteoglycan 1; cell surface-associated; fibroglycan)                                  |
| 202071_at                  | SDC4     | 5.3       | 20q12           | syndecan 4 (amphiglycan; ryudocan)                                                                                 |
| 204563_at                  | SELL     | 4.1       | 1q23-q25        | selectin L (lymphocyte adhesion molecule 1)                                                                        |
| 201427_s_at                | SEPP1    | 104.7     | 5q31            | selenoprotein P; plasma; 1                                                                                         |
| 228726_at                  | SERPINB1 | 6.1       | 6p25            | Serpin peptidase inhibitor; clade B (ovalbumin); member 1                                                          |
| 211474_s_at                | SERPINB6 | 8.2       | 6p25            | serpin peptidase inhibitor; clade B (ovalbumin); member 6                                                          |
| 209723_at                  | SERPINB9 | 33.2      | 6p25            | serpin peptidase inhibitor; clade B (ovalbumin); member 9                                                          |
| 202283_at                  | SERPINF1 | 51.0      | 17p13.1         | serpin peptidase inhibitor; clade F (alpha-2 antiplasmin; pigment epithelium derived factor); member 1             |
| 205352_at                  | SERPINI1 | 8.4       | 3q26.1          | serpin peptidase inhibitor; clade I (neuroserpin); member 1                                                        |
| 209848_s_at                | SILV     | 12.6      | 12q13-q14       | silver homolog (mouse)                                                                                             |
| 206310_at                  | SPINK2   | 22.3      | 4q12            | serine peptidase inhibitor; Kazal type 2 (acrosin-trypsin inhibitor)                                               |
| 205016_at                  | TGFA     | 6.0       | 2p13            | transforming growth factor; alpha                                                                                  |
| 226625_at                  | TGFBR3   | 3.9       | 1p33-p32        | Transforming growth factor; beta receptor III (betaglycan; 300kDa)                                                 |
| 202085_at                  | TJP2     | 4.7       | 9q13-q21        | tight junction protein 2 (zona occludens 2)                                                                        |
| 218113_at                  | TMEM2    | 3.0       | 9q13-q21        | transmembrane protein 2                                                                                            |
| 202688_at                  | TNFSF10  | 9.9       | 3q26            | tumor necrosis factor (ligand) superfamily; member 10                                                              |
| 207426_s_at                | TNFSF4   | 3.4       | 1q25            | tumor necrosis factor (ligand) superfamily; member 4 (tax-transcriptionally activated glycoprotein 1; 34kDa)=OX40L |
| 206907_at                  | TNFSF9   | 7.2       | 19p13.3         | tumor necrosis factor (ligand) superfamily; member 9=4-1BBL                                                        |
| 203476_at                  | TPBG     | 8.1       | 6q14-q15        | trophoblast glycoprotein                                                                                           |
| 200931_s_at                | VCL      | 3.4       | 10q22.1-q22.2   | vinculin                                                                                                           |
| 227530_at                  | AKAP12   | 29.7      | 6q24-q25        | A kinase (PRKA) anchor protein (gravin) 12                                                                         |
| <b>Signal transduction</b> |          |           |                 |                                                                                                                    |
| 218501_at                  | ARHGEF3  | 5.608957  | 3p21-p13        | Rho guanine nucleotide exchange factor (GEF) 3                                                                     |
| 227915_at                  | ASB2     | 4.578824  | 14q31-q32       | ankyrin repeat and SOCS box-containing 2                                                                           |
| 209682_at                  | CBLB     | 2.383455  | 3q13.11         | Cas-Br-M (murine) ecotropic retroviral transforming sequence b                                                     |
| 213385_at                  | CHN2     | 2.663243  | 7p15.3          | Chimerin (chimaerin) 2                                                                                             |
| 201041_s_at                | DUSP1    | 3.642625  | 5q34            | dual specificity phosphatase 1                                                                                     |
| 221563_at                  | DUSP10   | 2.159146  | 1q41            | dual specificity phosphatase 10                                                                                    |
| 207111_at                  | EMR1     | 10.911585 | 19p13.3         | egf-like module containing; mucin-like; hormone receptor-like 1                                                    |

|             |          |           |             |                                                                                         |
|-------------|----------|-----------|-------------|-----------------------------------------------------------------------------------------|
| 202609_at   | EPS8     | 3.561592  | 12q13       | epidermal growth factor receptor pathway substrate 8                                    |
| 224657_at   | ERRFI1   | 2.538888  | 1p36.12-36. | ERBB receptor feedback inhibitor 1                                                      |
| 226269_at   | GDAP1    | 3.563394  | 8q21.11     | Ganglioside-induced differentiation-associated protein 1                                |
| 204472_at   | GEM      | 5.296791  | 8q13-q21    | GTP binding protein overexpressed in skeletal muscle                                    |
| 227692_at   | GNAI1    | 4.049495  | 7q21        | guanine nucleotide binding protein (G protein); alpha inhibiting activity polypeptide 1 |
| 214022_s_at | IFITM1   | 5.950642  | 11p15.5     | interferon induced transmembrane protein 1 (9-27)                                       |
| 205227_at   | IL1RAP   | 5.148210  | 3q28        | interleukin 1 receptor accessory protein                                                |
| 231779_at   | IRAK2    | 3.637481  | 3p25.3      | interleukin-1 receptor-associated kinase 2                                              |
| 235252_at   | KSR      | 3.343448  | 17q11.2     | Kinase suppressor of ras                                                                |
| 202086_at   | MX1      | 8.533583  | 21q22.3     | myxovirus (influenza virus) resistance 1; interferon-inducible protein p78 (mouse)      |
| 223218_s_at | NFKBIZ   | 6.090429  | 3p12-q12    | nuclear factor of kappa light polypeptide gene enhancer in B-cells inhibitor; zeta      |
| 203964_at   | NMI      | 3.625705  | 2p24.3-q21. | N-myc (and STAT) interactor                                                             |
| 225626_at   | PAG1     | 13.847664 | 8q21.13     | phosphoprotein associated with glycosphingolipid microdomains 1                         |
| 203879_at   | PIK3CD   | 4.546094  | 1p36.2      | phosphoinositide-3-kinase; catalytic; delta polypeptide                                 |
| 201939_at   | PLK2     | 5.166119  | 5q12.1-q13. | polo-like kinase 2 (Drosophila)                                                         |
| 203680_at   | PRKAR2B  | 3.977774  | 7q22        | protein kinase; cAMP-dependent; regulatory; type II; beta                               |
| 203355_s_at | PSD3     | 2.951376  | 8pter-p23.3 | pleckstrin and Sec7 domain containing 3                                                 |
| 202252_at   | RAB13    | 22.696154 | 1q21.2      | RAB13; member RAS oncogene family                                                       |
| 219622_at   | RAB20    | 7.751698  | 13q34       | RAB20; member RAS oncogene family                                                       |
| 217764_s_at | RAB31    | 5.901696  | 18p11.3     | RAB31; member RAS oncogene family                                                       |
| 217762_s_at | RAB31    | 2.898373  | 18p11.3     | RAB31; member RAS oncogene family                                                       |
| 212561_at   | RAB6IP1  | 5.066949  | 11p15.4     | RAB6 interacting protein 1                                                              |
| 1553185_at  | RASEF    | 2.915433  | 9q21.32     | RAS and EF-hand domain containing                                                       |
| 230233_at   | RASGEF1B | 3.405272  | 4q21.3      | RasGEF domain family; member 1B                                                         |
| 225946_at   | RASSF8   | 3.301098  | 12p12.3     | Ras association (RalGDS/AF-6) domain family 8                                           |
| 203485_at   | RTN1     | 8.058881  | 14q23.1     | reticulon 1                                                                             |
| 34408_at    | RTN2     | 5.087315  | 19q13.32    | reticulon 2                                                                             |
| 226549_at   | SBK1     | 3.831661  | 16p11.2     | SH3-binding domain kinase 1                                                             |
| 209969_s_at | STAT1    | 6.280993  | 2q32.2      | signal transducer and activator of transcription 1; 91kDa                               |
| 206118_at   | STAT4    | 8.336130  | 2q32.2-q32. | signal transducer and activator of transcription 4                                      |
| 202695_s_at | STK17A   | 3.217840  | 7p12-p14    | serine/threonine kinase 17a (apoptosis-inducing)                                        |
| 220260_at   | TBC1D19  | 4.079907  | 4p15.2      | TBC1 domain family; member 19                                                           |
| 213107_at   | TNIK     | 4.944324  | 3q26.2      | TRAF2 and NCK interacting kinase                                                        |

**Cytoskeleton**

|             |         |           |          |                                                      |
|-------------|---------|-----------|----------|------------------------------------------------------|
| 224694_at   | ANTXR1  | 4.313905  | 2p13.1   | anthrax toxin receptor 1                             |
| 225524_at   | ANTXR2  | 6.4       | 4q21.21  | anthrax toxin receptor 2                             |
| 212077_at   | CALD1   | 24.821717 | 7q33     | caldesmon 1                                          |
| 212554_at   | CAP2    | 6.797074  | 6p22.3   | CAP; adenylate cyclase-associated protein; 2 (yeast) |
| 224583_at   | COTL1   | 3.240482  | 16q24.1  | coactosin-like 1 (Dictyostelium)                     |
| 212730_at   | DMN     | 3.619218  | 15q26.3  | desmuslin                                            |
| 225855_at   | EPB41L5 | 3.402565  | 2q14.2   | erythrocyte membrane protein band 4.1 like 5         |
| 217892_s_at | EPLIN   | 2.740133  | 12q13    | epithelial protein lost in neoplasm beta             |
| 208614_s_at | FLNB    | 7.493281  | 3p14.3   | filamin B; beta (actin binding protein 278)          |
| 203854_at   | IF      | 3.797042  | 4q25     | I factor (complement)                                |
| 226968_at   | KIF1B   | 2.620151  | 1p36.2   | kinesin family member 1B                             |
| 203130_s_at | KIF5C   | 7.126495  | 2q23.1   | kinesin family member 5C                             |
| 201596_x_a  | KRT18   | 2.355975  | 12q13    | keratin 18                                           |
| 225540_at   | MAP2    | 23.086531 | 2q34-q35 | Microtubule-associated protein 2                     |
| 225407_at   | MBP     | 2.908025  | 18q23    | myelin basic protein                                 |

|                   |           |           |             |                                                                                         |
|-------------------|-----------|-----------|-------------|-----------------------------------------------------------------------------------------|
| 201976_s_at       | MYO10     | 4.829546  | 5p15.1-p14. | myosin X                                                                                |
| 203215_s_at       | MYO6      | 13.698531 | 6q13        | myosin VI                                                                               |
| 218678_at         | NES       | 6.572018  | 1q23.1      | nestin                                                                                  |
| 210986_s_at       | TPM1      | 4.199909  | 15q22.1     | tropomyosin 1 (alpha)                                                                   |
| 204141_at         | TUBB2     | 6.341977  | 6p25        | tubulin; beta 2                                                                         |
| <b>Cell cycle</b> |           |           |             |                                                                                         |
| 221555_x_a        | CDC14B    | 3.900705  | 9q22.33     | CDC14 cell division cycle 14 homolog B ( <i>S. cerevisiae</i> )                         |
| 225685_at         | CDC42EP3  | 2.589167  | 2p21        | CDC42 effector protein (Rho GTPase binding) 3                                           |
| 202284_s_at       | CDKN1A    | 2.895731  | 6p21.2      | cyclin-dependent kinase inhibitor 1A (p21; Cip1)                                        |
| 213348_at         | CDKN1C    | 2.824281  | 11p15.5     | Cyclin-dependent kinase inhibitor 1C (p57; Kip2)                                        |
| 31874_at          | GAS2L1    | 7.043579  | 22q12.2     | growth arrest-specific 2 like 1                                                         |
| 1553599_a         | SYCP3     | 22.398095 | 12q         | synaptonemal complex protein 3                                                          |
| <b>Metabolism</b> |           |           |             |                                                                                         |
| 209459_s_at       | ABAT      | 6.501762  | 16p13.2     | 4-aminobutyrate aminotransferase                                                        |
| 209993_at         | ABCB1     | 12.194827 | 7q21.1      | ATP-binding cassette; sub-family B (MDR/TAP); member 1                                  |
| 209122_at         | ADFP      | 4.590956  | 9p22.1      | adipose differentiation-related protein                                                 |
| 226325_at         | ADSSL1    | 27.952493 | 14q32.33    | adenylosuccinate synthase like 1                                                        |
| 209160_at         | AKR1C3    | 22.108318 | 10p15-p14   | aldo-keto reductase family 1; member C3 (3-alpha hydroxysteroid dehydrogenase; type II) |
| 201243_s_at       | ATP1B1    | 6.387409  | 1q24        | ATPase; Na <sup>+</sup> /K <sup>+</sup> transporting; beta 1 polypeptide                |
| 213106_at         | ATP8A1    | 2.729268  | 4p14-p12    | ATPase; aminophospholipid transporter (APLT); Class I; type 8A; member 1                |
| 206633_at         | CHRNA1    | 39.181905 | 2q24-q32    | cholinergic receptor; nicotinic; alpha polypeptide 1 (muscle)                           |
| 213317_at         | CLIC5     | 4.826641  | 6p12.1-21.1 | Chloride intracellular channel 5                                                        |
| 231265_at         | COX7B2    | 54.149220 | 4p12        | cytochrome c oxidase subunit VIIb2                                                      |
| 201116_s_at       | CPE       | 13.132689 | 4q32.3      | carboxypeptidase E                                                                      |
| 202295_s_at       | CTSH      | 3.066515  | 15q24-q25   | cathepsin H                                                                             |
| 210074_at         | CTSL2     | 4.757641  | 9q22.2      | cathepsin L2                                                                            |
| 203475_at         | CYP19A1   | 3.882110  | 15q21.1     | cytochrome P450; family 19; subfamily A; polypeptide 1                                  |
| 202436_s_at       | CYP1B1    | 22.756835 | 2p21        | cytochrome P450; family 1; subfamily B; polypeptide 1                                   |
| 228391_at         | CYP4V2    | 3.956945  | 4q35.1-q35. | cytochrome P450; family 4; subfamily V; polypeptide 2                                   |
| 214079_at         | DHRS2     | 11.0      | 14q11.2     | dehydrogenase/reductase (SDR family) member 2                                           |
| 219532_at         | ELOVL4    | 18.340566 | 6q14        | elongation of very long chain fatty acids (FEN1/Elo2; SUR4/Elo3; yeast)-like 4          |
| 209392_at         | ENPP2     | 76.288889 | 8q24.1      | ectonucleotide pyrophosphatase/phosphodiesterase 2 (autotaxin)                          |
| 202838_at         | FUCA1     | 4.167095  | 1p34        | fucosidase; alpha-L- 1; tissue                                                          |
| 211458_s_at       | GABARAPL1 | 25.438711 | 12p13.2     | GABA(A) receptor-associated protein like 1                                              |
| 231577_s_at       | GBP1      | 10.053036 | 1p22.2      | guanylate binding protein 1; interferon-inducible; 67kDa                                |
| 202748_at         | GBP2      | 3.240931  | 1p22.2      | guanylate binding protein 2; interferon-inducible                                       |
| 223434_at         | GBP3      | 18.225238 | 1p22.2      | guanylate binding protein 3                                                             |
| 213343_s_at       | GDPD5     | 7.316093  | 11q13.4-q13 | glycerophosphodiester phosphodiesterase domain containing 5                             |
| 226160_at         | H6PD      | 2.423553  | 1p36        | hexose-6-phosphate dehydrogenase (glucose 1-dehydrogenase)                              |
| 1552767_a         | HS6ST2    | 8.948535  | Xq26.2      | heparan sulfate 6-O-sulfotransferase 2                                                  |
| 205404_at         | HSD11B1   | 16.843405 | 1q32-q41    | hydroxysteroid (11-beta) dehydrogenase 1                                                |
| 230966_at         | IL4I1     | 4.440531  | 19q13.3-q13 | interleukin 4 induced 1                                                                 |
| 203710_at         | ITPR1     | 3.389576  | 3p26-p25    | inositol 1;4;5-triphosphate receptor; type 1                                            |
| 204179_at         | MB        | 25.470101 | 22q13.1     | myoglobin                                                                               |
| 204059_s_at       | ME1       | 2.388811  | 6q12        | malic enzyme 1; NADP(+)-dependent; cytosolic                                            |
| 225782_at         | MSRB3     | 3.277966  | 12q14.3     | methionine sulfoxide reductase B3                                                       |
| 214440_at         | NAT1      | 2.488258  | 8p23.1-p21. | N-acetyltransferase 1 (arylamine N-acetyltransferase)                                   |
| 211685_s_at       | NCALD     | 2.463698  | 8q22-q23    | neurocalcin delta /// neurocalcin delta                                                 |
| 210519_s_at       | NQO1      | 2.762966  | 16q22.1     | NAD(P)H dehydrogenase; quinone 1                                                        |

|                               |         |           |                |                                                                                                                                        |
|-------------------------------|---------|-----------|----------------|----------------------------------------------------------------------------------------------------------------------------------------|
| 219369_s_at                   | OTUB2   | 2.617270  | 14q32.13       | OTU domain; ubiquitin aldehyde binding 2                                                                                               |
| 202430_s_at                   | PLSCR1  | 5.437236  | 3q23           | phospholipid scramblase 1                                                                                                              |
| 204286_s_at                   | PMAIP1  | 3.809834  | 18q21.32       | phorbol-12-myristate-13-acetate-induced protein 1                                                                                      |
| 206345_s_at                   | PON1    | 5.028684  | 7q21.3         | paraoxonase 1                                                                                                                          |
| 201876_at                     | PON2    | 2.918999  | 7q21.3         | paraoxonase 2                                                                                                                          |
| 202458_at                     | PRSS23  | 10.562525 | 11q14.1        | protease; serine; 23                                                                                                                   |
| 238017_at                     | RDHE2   | 48.660833 | 8q12.1         | epidermal retinal dehydrogenase 2                                                                                                      |
| 204730_at                     | RIMS3   | 2.598560  | 1pter-p22.2    | regulating synaptic membrane exocytosis 3                                                                                              |
| 217983_s_at                   | RNASET2 | 2.551558  | 6q27           | ribonuclease T2                                                                                                                        |
| 242625_at                     | RSAD2   | 56.690476 | 2p25.2         | radical S-adenosyl methionine domain containing 2                                                                                      |
| 210592_s_at                   | SAT     | 6.446497  | Xp22.1         | spermidine/spermine N1-acetyltransferase                                                                                               |
| 210432_s_at                   | SCN3A   | 3.564081  | 2q24           | sodium channel; voltage-gated; type III; alpha                                                                                         |
| 223391_at                     | SGPP1   | 4.615909  | 14q23.2        | sphingosine-1-phosphate phosphatase 1                                                                                                  |
| 226728_at                     | SLC27A1 | 2.429680  | 19p13.11       | solute carrier family 27 (fatty acid transporter); member 1                                                                            |
| 216236_s_at                   | SLC2A14 | 4.261528  | 12p13.31       | solute carrier family 2 (facilitated glucose transporter); member 14                                                                   |
| 202497_x_a                    | SLC2A3  | 28.133124 | 12p13.3        | solute carrier family 2 (facilitated glucose transporter); member 3                                                                    |
| 202219_at                     | SLC6A8  | 6.261463  | Xq28           | solute carrier family 6 (neurotransmitter transporter; creatine); member 8                                                             |
| 216370_s_at                   | TKTL1   | 56.588462 | Xq28           | transketolase-like 1                                                                                                                   |
| 223949_at                     | TMPRSS3 | 6.809925  | 21q22.3        | transmembrane protease; serine 3                                                                                                       |
| 204140_at                     | TPST1   | 3.244596  | 7q11.21        | tyrosylprotein sulfotransferase 1                                                                                                      |
| 213423_x_a                    | TUSC3   | 13.708826 | 8p22           | tumor suppressor candidate 3                                                                                                           |
| 219211_at                     | USP18   | 30.611842 | 22q11.21       | ubiquitin specific peptidase 18                                                                                                        |
| <b>Protein binding</b>        |         |           |                |                                                                                                                                        |
| 206385_s_at                   | ANK3    | 14.747972 | 10q21          | ankyrin 3; node of Ranvier (ankyrin G)                                                                                                 |
| 208792_s_at                   | CLU     | 3.335931  | 8p21-p12       | clusterin (complement lysis inhibitor; SP-40;40; sulfated glycoprotein 2; testosterone-repressed prostate message 2; apolipoprotein J) |
| 203695_s_at                   | DFNA5   | 9.246667  | 7p15           | deafness; autosomal dominant 5                                                                                                         |
| 200606_at                     | DSP     | 2.542454  | 6p24           | desmoplakin                                                                                                                            |
| 200878_at                     | EPAS1   | 3.469289  | 2p21-p16       | endothelial PAS domain protein 1                                                                                                       |
| 225328_at                     | FBXO32  | 8.358816  | 8q24.13        | F-box protein 32                                                                                                                       |
| 200799_at                     | HSPA1A  | 63.106202 | 6p21.3         | heat shock 70kDa protein 1A                                                                                                            |
| 211538_s_at                   | HSPA2   | 14.047356 | 14q24.1        | heat shock 70kDa protein 2                                                                                                             |
| 228153_at                     | IBRDC2  | 5.602239  | 6p22.3         | IBR domain containing 2                                                                                                                |
| 201315_x_a                    | IFITM2  | 4.948547  | 11p15.5        | interferon induced transmembrane protein 2 (1-8D)                                                                                      |
| 209270_at                     | LAMB3   | 12.486905 | 1q32           | laminin; beta 3                                                                                                                        |
| 203186_s_at                   | S100A4  | 13.743718 | 1q21           | S100 calcium binding protein A4 (calcium protein; calvasculin; metastasin; murine placental homolog)                                   |
| 204030_s_at                   | SCHIP1  | 3.733547  | 3q25.32-q25.32 | schwannomin interacting protein 1                                                                                                      |
| 33323_r_at                    | SFN     | 4.709530  | 1p36.11        | stratifin                                                                                                                              |
| 218404_at                     | SNX10   | 3.568290  | 7p15.2         | sorting nexin 10                                                                                                                       |
| 205573_s_at                   | SNX7    | 24.122635 | 1p21.3         | sorting nexin 7                                                                                                                        |
| 209198_s_at                   | SYT11   | 9.746697  | 1q21.2         | synaptotagmin XI                                                                                                                       |
| 232914_s_at                   | SYTL2   | 13.813970 | 11q14          | synaptotagmin-like 2                                                                                                                   |
| 232692_at                     | TDRD6   | 9.182368  | 6p12.3         | tudor domain containing 6                                                                                                              |
| 213361_at                     | TDRD7   | 3.285387  | 9q22.33        | tudor domain containing 7                                                                                                              |
| 228285_at                     | TDRD9   | 14.662381 | 14q32.33       | tudor domain containing 9                                                                                                              |
| <b>Cancer testis antigens</b> |         |           |                |                                                                                                                                        |
| 235700_at                     | CT45-2  | 30.894326 | Xq26.3         | cancer/testis antigen CT45-2                                                                                                           |
| 214603_at                     | MAGEA2  | 30.647547 | Xq28           | melanoma antigen family A; 2                                                                                                           |
| 210437_at                     | MAGEA9  | 5.438349  | Xq28           | melanoma antigen family A; 9                                                                                                           |
| 204086_at                     | PRAME   | 12.234705 | 22q11.22       | preferentially expressed antigen in melanoma                                                                                           |

|             |         |           |         |                                                                       |
|-------------|---------|-----------|---------|-----------------------------------------------------------------------|
| 220922_s_at | SPANXA1 | 55.224557 | Xq27.1  | sperm protein associated with the nucleus; X-linked; family member A1 |
| 220217_x_a  | SPANXC  | 4.979443  | Xq27.1  | SPANX family; member C                                                |
| 210394_x_a  | SSX4    | 12.129489 | Xp11.23 | synovial sarcoma; X breakpoint 4                                      |
| 207281_x_a  | VXC     | 9.556974  | Xp22    | variable charge; X-linked                                             |

**Nuclear proteins and transcription factors**

|             |           |            |                |                                                                            |
|-------------|-----------|------------|----------------|----------------------------------------------------------------------------|
| 238825_at   | ACRC      | 9.2        | Xq13.1         | acidic repeat containing                                                   |
| 202672_s_at | ATF3      | 3.433897   | 1q32.3         | activating transcription factor 3                                          |
| 219870_at   | ATF7IP2   | 2.949508   | 16p13.13       | activating transcription factor 7 interacting protein 2                    |
| 206588_at   | DAZL      | 138.560000 | 3p24.3         | deleted in azoospermia-like                                                |
| 222793_at   | DDX58     | 9.721345   | 9p12           | DEAD (Asp-Glu-Ala-Asp) box polypeptide 58                                  |
| 201694_s_at | EGR1      | 3.458304   | 5q31.1         | early growth response 1                                                    |
| 205249_at   | EGR2      | 14.772231  | 10q21.1        | early growth response 2 (Krox-20 homolog; Drosophila)                      |
| 225645_at   | EHF       | 8.076102   | 11p12          | Ets homologous factor                                                      |
| 228260_at   | ELAVL2    | 4.008421   | 9p21           | ELAV (embryonic lethal; abnormal vision; Drosophila)-like 2 (Hu antigen B) |
| 210827_s_at | ELF3      | 3.722221   | 1q32.2         | E74-like factor 3 (ets domain transcription factor; epithelial-specific )  |
| 203349_s_at | ETV5      | 4.666093   | 3q28           | ets variant gene 5 (ets-related molecule)                                  |
| 209603_at   | GATA3     | 5.223190   | 10p15          | GATA binding protein 3                                                     |
| 208886_at   | H1FO      | 3.437433   | 22q13.1        | H1 histone family; member 0                                                |
| 214469_at   | HIST1H2AE | 9.025855   | 6p22.2-p21.1   | histone 1; H2ae                                                            |
| 235456_at   | HIST1H2BD | 7.573230   | 6p21.3         | Histone 1; H2bd                                                            |
| 210387_at   | HIST1H2BG | 6.678659   | 6p21.3         | histone 1; H2bg                                                            |
| 211597_s_at | HOP       | 13.810667  | 4q11-q12       | homeodomain-only protein                                                   |
| 208937_s_at | ID1       | 4.233509   | 20q11          | inhibitor of DNA binding 1; dominant negative helix-loop-helix protein     |
| 207826_s_at | ID3       | 44.662710  | 1p36.13-p36.13 | inhibitor of DNA binding 3; dominant negative helix-loop-helix protein     |
| 219209_at   | IFIH1     | 4.127336   | 2p24.3-q24.3   | interferon induced with helicase C domain 1                                |
| 202597_at   | IRF6      | 7.290339   | 1q32.3-q41     | interferon regulatory factor 6                                             |
| 208436_s_at | IRF7      | 7.613756   | 11p15.5        | interferon regulatory factor 7                                             |
| 225798_at   | JAZF1     | 2.774329   | 7p15.2-p15.2   | juxtaposed with another zinc finger gene 1                                 |
| 1555420_a   | KLF7      | 2.726338   | 2q32           | Kruppel-like factor 7 (ubiquitous)                                         |
| 236565_s_at | LARP6     | 5.204811   | 15q23          | La ribonucleoprotein domain family; member 6                               |
| 221011_s_at | LBH       | 6.756324   | 2p23.1         | likely ortholog of mouse limb-bud and heart gene                           |
| 229475_at   | MAEL      | 51.269048  | 1q24.1         | maelstrom homolog (Drosophila)                                             |
| 235457_at   | MAML2     | 4.216371   | 11q21          | mastermind-like 2 (Drosophila)                                             |
| 242794_at   | MAML3     | 6.908394   | 4q28           | mastermind-like 3 (Drosophila)                                             |
| 238430_x_a  | MGC19764  | 3.231570   | 17q12          | likely ortholog of mouse schlafen 5                                        |
| 224917_at   | MIRN21    | 6.356129   | ---            | microRNA 21                                                                |
| 226066_at   | MITF      | 2.456457   | 3p14.2-p14.2   | microphthalmia-associated transcription factor                             |
| 223484_at   | NMES1     | 204.889956 | 15q21.1        | normal mucosa of esophagus specific 1                                      |
| 205552_s_at | OAS1      | 6.933458   | 12q24.1        | 2prime;5prime-oligoadenylate synthetase 1; 40/46kDa                        |
| 204972_at   | OAS2      | 3.190365   | 12q24.2        | 2prime-5prime-oligoadenylate synthetase 2; 69/71kDa                        |
| 210797_s_at | OASL      | 3.787145   | 12q24.2        | 2prime-5prime-oligoadenylate synthetase-like                               |
| 218543_s_at | PARP12    | 9.435608   | 7q34           | poly (ADP-ribose) polymerase family; member 12                             |
| 224701_at   | PARP14    | 10.538761  | 3q21.1         | poly (ADP-ribose) polymerase family; member 14                             |
| 223220_s_at | PARP9     | 12.478231  | 3q13-q21       | poly (ADP-ribose) polymerase family; member 9                              |
| 204082_at   | PBX3      | 2.156607   | 9q33-q34       | pre-B-cell leukemia transcription factor 3                                 |
| 209598_at   | PNMA2     | 4.163118   | 8p21.2         | paraneoplastic antigen MA2                                                 |
| 212636_at   | QKI       | 3.062588   | 6q26-27        | quaking homolog; KH domain RNA binding (mouse)                             |
| 223394_at   | SERTAD1   | 3.394413   | 19q13.1-q13.1  | SERTA domain containing 1                                                  |
| 225123_at   | SESN3     | 10.733899  | 11q21          | Sestrin 3                                                                  |

|            |        |          |             |                                                          |
|------------|--------|----------|-------------|----------------------------------------------------------|
| 201416_at  | SOX4   | 6.414401 | 6p22.3      | SRY (sex determining region Y)-box 4                     |
| 209762_x_a | SP110  | 5.605817 | 2q37.1      | SP110 nuclear body protein                               |
| 209306_s_a | SWAP70 | 3.030550 | 11p15       | SWAP-70 protein                                          |
| 227279_at  | TCEAL3 | 2.585833 | Xq22.2      | transcription elongation factor A (SII)-like 3           |
| 212761_at  | TCF7L2 | 4.552884 | 10q25.3     | transcription factor 7-like 2 (T-cell specific; HMG-box) |
| 203313_s_a | TGIF   | 4.363964 | 18p11.3     | TGFB-induced factor (TALE family homeobox)               |
| 228988_at  | ZNF6   | 3.531261 | Xq21.1-q21. | zinc finger protein 6 (CMPX1)                            |

**Apoptosis**

|            |        |           |            |                                                      |
|------------|--------|-----------|------------|------------------------------------------------------|
| 201012_at  | ANXA1  | 10.954555 | 9q12-q21.2 | annexin A1                                           |
| 210538_s_a | BIRC3  | 7.916351  | 11q22      | baculoviral IAP repeat-containing 3                  |
| 210026_s_a | CARD10 | 7.184831  | 22q13.1    | caspase recruitment domain family; member 10         |
| 205483_s_a | G1P2   | 11.921743 | 1p36.33    | interferon; alpha-inducible protein (clone IFI-15K)  |
| 204415_at  | G1P3   | 10.413424 | 1p35       | interferon; alpha-inducible protein (clone IFI-6-16) |
| 201631_s_a | IER3   | 4.433514  | 6p21.3     | immediate early response 3                           |
| 202411_at  | IFI27  | 9.337262  | 14q32      | interferon; alpha-inducible protein 27               |
| 221690_s_a | NALP2  | 20.432058 | 19q13.42   | NACHT; leucine rich repeat and PYD containing 2      |
| 237461_at  | NALP7  | 7.243609  | 19q13.42   | NACHT; leucine rich repeat and PYD containing 7      |
| 228617_at  | XAF1   | 26.195583 | 17p13.1    | XIAP associated factor-1                             |

**Others**

|            |          |           |                 |                                                                                                               |
|------------|----------|-----------|-----------------|---------------------------------------------------------------------------------------------------------------|
| 1559336_at | ---      | 18.4      | ---             | Homo sapiens; clone IMAGE:4714787                                                                             |
| 211781_x_a | ---      | 7.5       | ---             | ---                                                                                                           |
| 222184_at  | ---      | 3.1       | ---             | Clone 25015 mRNA sequence                                                                                     |
| 225842_at  | ---      | 27.9      | ---             | CDNA clone IMAGE:5531727                                                                                      |
| 226725_at  | ---      | 6.1       | ---             | Transcribed locus                                                                                             |
| 227193_at  | ---      | 4.1       | ---             | CDNA clone IMAGE:4828750                                                                                      |
| 227290_at  | ---      | 2.8       | ---             | CDNA FLJ13598 fis; clone PLACE1009921                                                                         |
| 227503_at  | ---      | 5.8       | ---             | CDNA FLJ43100 fis; clone CTONG2003100                                                                         |
| 229968_at  | ---      | 17.0      | ---             | Transcribed locus                                                                                             |
| 230383_x_a | ---      | 5.9       | ---             | Transcribed locus                                                                                             |
| 230499_at  | ---      | 3.7       | ---             | Transcribed locus                                                                                             |
| 230860_at  | ---      | 2.9       | ---             | Transcribed locus                                                                                             |
| 234250_at  | ---      | 5.1       | ---             | Full-length cDNA clone CS0DJ014YP15 of T cells (Jurkat cell line) Cot 10-normalized of Homo sapiens (human)   |
| 235072_s_a | ---      | 8.1       | ---             | Transcribed locus                                                                                             |
| 235276_at  | ---      | 18.0      | ---             | ---                                                                                                           |
| 236856_x_a | ---      | 2.307788  | ---             | CDNA FLJ34374 fis; clone FEBRA2017502                                                                         |
| 238725_at  | ---      | 2.645117  | ---             | Transcribed locus; weakly similar to XP_496299.1 PREDICTED: hypothetical protein LOC148206 [Homo sapiens]     |
| 240979_at  | ---      | 4.439770  | ---             | ---                                                                                                           |
| 241262_at  | ---      | 2.294786  | ---             | ---                                                                                                           |
| 241763_s_a | ---      | 7.187800  | ---             | ---                                                                                                           |
| 241898_at  | ---      | 2.757790  | ---             | Transcribed locus; moderately similar to XP_517655.1 PREDICTED: similar to KIAA0825 protein [Pan troglodytes] |
| 212543_at  | AIM1     | 11.338480 | 6q21            | absent in melanoma 1                                                                                          |
| 203404_at  | ARMCX2   | 17.881142 | Xq21.33-q22.2   | armadillo repeat containing; X-linked 2                                                                       |
| 225283_at  | ARRDC4   | 4.7       | 15q26.3         | arrestin domain containing 4                                                                                  |
| 212599_at  | AUTS2    | 3.800571  | 7q11.22         | autism susceptibility candidate 2                                                                             |
| 215440_s_a | BEXL1    | 10.212129 | Xq22.1-q22.     | brain expressed X-linked-like 1                                                                               |
| 212560_at  | C11orf32 | 7.711916  | ---             | chromosome 11 open reading frame 32                                                                           |
| 221260_s_a | C12orf22 | 2.981637  | 12q13.11-q13.12 | chromosome 12 open reading frame 22                                                                           |
| 1559584_a  | C16orf54 | 29.908986 | 16p11.2         | chromosome 16 open reading frame 54                                                                           |
| 230000_at  | C17orf27 | 2.591506  | 17q25.3         | chromosome 17 open reading frame 27                                                                           |

|             |               |           |             |                                                             |
|-------------|---------------|-----------|-------------|-------------------------------------------------------------|
| 229973_at   | C1orf173      | 16.834091 | 1p31.1      | chromosome 1 open reading frame 173                         |
| 210785_s_at | C1orf38       | 2.853576  | 1p35.3      | chromosome 1 open reading frame 38                          |
| 238480_at   | chromosome 18 | 5.509256  | ---         | Chromosome 18 open reading frame 50                         |
| 207030_s_at | CSRP2         | 7.884553  | 12q21.1     | cysteine and glycine-rich protein 2                         |
| 219313_at   | DKFZp434C032  | 7.873571  | 3q13.31     | hypothetical protein DKFZp434C0328                          |
| 226000_at   | DKFZp547A023  | 8.287219  | 1p13.2      | CTTNBP2 N-terminal like                                     |
| 224952_at   | DKFZP564D166  | 2.867678  | 17q23.3     | putative ankyrin-repeat containing protein                  |
| 225355_at   | DKFZP761M151  | 9.643741  | 5q35.2      | hypothetical protein DKFZP761M1511                          |
| 235085_at   | DKFZp761P042  | 5.680803  | 8p23.1      | hypothetical protein DKFZp761P0423                          |
| 203498_at   | DSCR1L1       | 4.332596  | 6p21.1-p12. | Down syndrome critical region gene 1-like 1                 |
| 235759_at   | EFCBP1        | 4.162100  | 8q21.3      | EF-hand calcium binding protein 1                           |
| 227609_at   | EPSTI1        | 6.972805  | 13q13.3     | epithelial stromal interaction 1 (breast)                   |
| 227410_at   | FAM43A        | 3.512958  | 3q29        | family with sequence similarity 43; member A                |
| 228745_at   | FLJ13611      | 3.656912  | 5q12.3      | Hypothetical protein FLJ13611                               |
| 218986_s_at | FLJ20035      | 30.135000 | 4q32.3      | hypothetical protein FLJ20035                               |
| 228423_at   | FLJ21159      | 6.226380  | 4q32.1      | ASAP                                                        |
| 228152_s_at | FLJ31033      | 58.424226 | 4q32.3      | hypothetical protein FLJ31033                               |
| 230012_at   | FLJ34790      | 7.012810  | 17p13.1     | hypothetical protein FLJ34790                               |
| 228937_at   | FLJ38725      | 4.903958  | 13q14.11    | hypothetical protein FLJ38725                               |
| 229559_at   | FLJ40125      | 3.782424  | 19q13.32    | hypothetical protein FLJ40125                               |
| 214453_s_at | IFI44         | 46.772836 | 1p31.1      | interferon-induced protein 44                               |
| 203153_at   | IFIT1         | 66.912766 | 10q25-q26   | interferon-induced protein with tetratricopeptide repeats 1 |
| 226757_at   | IFIT2         | 13.898479 | 10q23-q25   | interferon-induced protein with tetratricopeptide repeats 2 |
| 229450_at   | IFIT3         | 21.254684 | 10q24       | interferon-induced protein with tetratricopeptide repeats 3 |
| 203595_s_at | IFIT5         | 85.342379 | 10q23.31    | interferon-induced protein with tetratricopeptide repeats 5 |
| 235048_at   | KIAA0888      | 3.690458  | 5q13.3      | KIAA0888 protein                                            |
| 200897_s_at | KIAA0992      | 7.116526  | 4q32.3      | palladin                                                    |
| 212906_at   | KIAA1201      | 5.621374  | 11q24.1     | KIAA1201 protein                                            |
| 225525_at   | KIAA1671      | 2.522698  | ---         | KIAA1671 protein                                            |
| 226702_at   | LOC129607     | 26.439604 | 2p25.2      | hypothetical protein LOC129607                              |
| 241353_s_at | LOC202775     | 4.194030  | 7q34        | hypothetical LOC202775                                      |
| 239624_at   | LOC440885     | 27.203327 | 2p11.1      | LOC440885                                                   |
| 224480_s_at | MGC11324      | 4.189111  | 4q21.23     | hypothetical protein MGC11324                               |
| 214696_at   | MGC14376      | 2.859701  | 17p13.3     | hypothetical protein MGC14376                               |
| 227038_at   | MGC26963      | 4.900348  | 4q25        | hypothetical protein MGC26963                               |
| 236595_at   | MGC4677       | 19.738590 | 2p11.2      | Hypothetical protein MGC4677                                |
| 207738_s_at | NCKAP1        | 3.261131  | 2q32        | NCK-associated protein 1                                    |
| 229963_at   | NGFRAP1L1     | 20.157639 | Xq22.1      | NGFRAP1-like 1                                              |
| 205380_at   | PDZK1         | 9.319589  | 1q21        | PDZ domain containing 1                                     |
| 212094_at   | PEG10         | 23.895641 | 7q21        | paternally expressed 10                                     |
| 217996_at   | PHLDA1        | 8.634643  | 12q15       | pleckstrin homology-like domain; family A; member 1         |
| 225688_s_at | PHLDB2        | 8.761139  | 3q13.2      | pleckstrin homology-like domain; family B; member 2         |
| 231131_at   | RP1-32F7.2    | 49.947646 | Xq21.33     | hypothetical protein FLJ37659                               |
| 220167_s_at | TP53TG3       | 3.335873  | 16p13       | TP53TG3 protein                                             |
| 213293_s_at | TRIM22        | 11.889325 | 11p15       | tripartite motif-containing 22                              |
| 227174_at   | WDR72         | 7.028993  | 15q21.3     | WD repeat domain 72                                         |
| 224894_at   | YAP1          | 3.739192  | 11q13       | Yes-associated protein 1; 65kDa                             |
| 219062_s_at | ZCCHC2        | 4.717546  | 18q21.33    | zinc finger; CCHC domain containing 2                       |
