# Supplementary material for: DNMTi/HDACi combined epigenetic targeted treatment induces reprogramming of myeloma cells in the direction of normal plasma cells
Source: PubMed Central journal article supplement — Br J Cancer. 2018 Mar 2;118(8):1062–73. doi: 10.1038/s41416-018-0025-x (PMC5931098; doi:10.1038/s41416-018-0025-x), 2018-03-02
Supplement: 41416_2018_25_MOESM4_ESM.pdf [file 41416_2018_25_MOESM4_ESM.pdf]

**TABLE S3: Genes overexpressed in decitabine/quisinostat treated 5T33MM inoculated mice. 5T33MM inoculated mice were treated daily with 0.2mg/kg decitabine and once every other day with 1.5mg/kg quisinostat for 5 days. Tumor cells were purified and gene expression was profiled with Affymetrix 450\_2 microarray. Genes significantly differentially expressed between control and decitabine + quisinostat treated mice were identified using SAM supervised paired analysis with a 5% false discovery rate.**

| Probeset                | Gene          | Ratio | Banding  | Affymetrix description                                      |
|-------------------------|---------------|-------|----------|-------------------------------------------------------------|
| 1442945_at              | 2010109K09Rik | 2.24  | 2p13.3   | RIKEN cDNA 2010109K09 gene                                  |
| 1437717_x_2610005L07Rik |               | 2.07  | 8p21.3   | cadherin 11 pseudogene                                      |
| 1419033_at              | 2610018G03Rik | 2.40  | Xp11.23  | RIKEN cDNA 2610018G03 gene                                  |
| 1457593_at              | 2610202C22Rik | 2.11  | 10q21.1  | RIKEN cDNA 2610202C22 gene                                  |
| 1437576_at              | 2810427A07Rik | 2.16  | 17q12    | RIKEN cDNA 2810427A07 gene                                  |
| 1453976_at              | 4432414F05Rik | 2.53  | 13q14.3  | RIKEN cDNA 4432414F05 gene                                  |
| 1456201_at              | 4632427E13Rik | 2.05  | 7q22.1   | RIKEN cDNA 4632427E13 gene                                  |
| 1446425_at              | 4732418C07Rik | 3.64  | 4q26     | RIKEN cDNA 4732418C07 gene                                  |
| 1456706_at              | 4833441D16Rik | 2.26  | 5p15.33  | RIKEN cDNA 4833441D16 gene                                  |
| 1453512_at              | 5830407P18Rik | 2.69  | 14       | RIKEN cDNA 5830407P18 gene                                  |
| 1456296_at              | 5830418K08Rik | 2.69  | 9p22.3   | RIKEN cDNA 5830418K08 gene                                  |
| 1430089_at              | 5830469G19Rik | 2.23  | 4q28.2   | RIKEN cDNA 5830469G19 gene                                  |
| 1430585_at              | 5930436O19Rik | 4.03  |          | RIKEN cDNA 5930436O19 gene                                  |
| 1433203_at              | 6030400A10Rik | 2.60  | 5p12     | RIKEN cDNA 6030400A10 gene                                  |
| 1456896_at              | 6720462K09Rik | 2.37  | 4q31.23  | RIKEN cDNA 6720462K09 gene                                  |
| 1429478_at              | 6720463M24Rik | 2.03  | 14q32.2  | RIKEN cDNA 6720463M24 gene                                  |
| 1441352_at              | 9430034N14Rik | 2.36  | 4q23.1   | RIKEN cDNA 9430034N14 gene                                  |
| 1456758_at              | 9930017N22Rik | 2.09  | 15q14    | RIKEN cDNA 9930017N22 gene                                  |
| 1440671_at              | A130012E19Rik | 2.05  | 10q25.2  | RIKEN cDNA A130012E19 gene                                  |
| 1446619_at              | A130038J17Rik | 2.14  | 14q31.1  | RIKEN cDNA A130038J17 gene                                  |
| 1444482_at              | A130078K24Rik | 2.19  | 14q24.2  | RIKEN cDNA A130078K24 gene                                  |
| 1420161_at              | AA409749      | 2.37  | 10q25.3  | expressed sequence AA409749                                 |
| 1434046_at              | AA467197      | 4.03  | 2q14.3   | expressed sequence AA467197                                 |
| 1455221_at              | Abcg1         | 2.16  | 17q11.2  | ATP-binding cassette, sub-family G (WHITE), member 1        |
| 1423883_at              | Acsl1         | 2.32  | 8q11.1   | acyl-CoA synthetase long-chain family member 1              |
| 1429883_at              | Actl6a        | 2.30  | 3p22.3   | actin-like 6A                                               |
| 1425362_at              | Agfg2         | 2.07  | 5q31.2   | ArfGAP with FG repeats 2                                    |
| 1452217_at              | Ahnak         | 2.44  | 19p13.2  | AHNAK nucleoprotein (desmoyokin)                            |
| 1449077_at              | Ahsp          | 2.18  |          | alpha hemoglobin stabilizing protein                        |
| 1455161_at              | AI504432      | 2.85  | 3q13.12  | expressed sequence AI504432                                 |
| 1426942_at              | Aim1          | 6.02  | 10q11.21 | absent in melanoma 1                                        |
| 1425684_at              | Akr1b10       | 3.56  | 6p21.31  | aldo-keto reductase family 1, member B10 (aldose reductase) |
| 1436538_at              | Ankrd37       | 2.18  | 8q11.1   | ankyrin repeat domain 37                                    |
| 1448213_at              | Anxa1         | 2.58  | 19p12    | annexin A1                                                  |
| 1460330_at              | Anxa3         | 2.36  | 5q15     | annexin A3                                                  |
| 1432007_s_at            | Ap2a2         | 2.08  | 7q36.1   | adaptor protein complex AP-2, alpha 2 subunit               |
| 1416134_at              | Aplp1         | 3.98  | 7p14.3   | amyloid beta (A4) precursor-like protein 1                  |
| 1427442_a               | App           | 2.35  | 16q24.1  | amyloid beta (A4) precursor protein                         |
| 1450460_at              | Aqp3          | 0.48  | 4p14     | aquaporin 3                                                 |
| 1452291_at              | Arap2         | 2.40  | 5q12.2   | ArfGAP with RhoGAP domain, ankyrin repeat and PH domain 2   |
| 1421134_at              | Areg          | 4.49  | 5q14.3   | amphiregulin                                                |
| 1435694_at              | Arhgap26      | 2.33  | 18q12.3  | Rho GTPase activating protein 26                            |
| 1426454_at              | Arhgdib       | 2.84  | 6q23.3   | Rho, GDP dissociation inhibitor (GDI) beta                  |

|            |               |      |          |                                                                                          |
|------------|---------------|------|----------|------------------------------------------------------------------------------------------|
| 1442295_at | Arpc2         | 2.21 | 1p31.1   | Actin related protein 2/3 complex, subunit 2                                             |
| 1454617_at | Arrdc3        | 2.20 | 13q31.1  | arrestin domain containing 3                                                             |
| 1429189_at | Arsb          | 2.02 | 13q31.3  | arylsulfatase B                                                                          |
| 1444668_at | Astx          | 2.25 | Xq25     | amplified spermatogenic transcripts X encoded                                            |
| 1435381_at | Atat1         | 2.57 | 17q12    | alpha tubulin acetyltransferase 1                                                        |
| 1449363_at | Atf3          | 3.96 | 1q31.2   | activating transcription factor 3                                                        |
| 1455949_at | Atp1b1        | 2.74 | 1q24.1   | ATPase, Na <sup>+</sup> /K <sup>+</sup> transporting, beta 1 polypeptide                 |
| 1439814_at | Atp8b4        | 2.39 | 2q14.3   | ATPase, class I, type 8B, member 4                                                       |
| 1430000_at | B230117O15Rik | 2.25 | 4p16.3   | RIKEN cDNA B230117O15 gene                                                               |
| 1436240_at | B230214O09Rik | 2.06 | 6p12.3   | RIKEN cDNA B230214O09 gene                                                               |
| 1435758_at | B4galt6       | 2.73 | 18q11.2  | UDP-Gal:betaGlcNAc beta 1,4-galactosyltransferase, polypeptide 6                         |
| 1439293_at | BC031353      | 2.26 | 9q21.13  | cDNA sequence BC031353                                                                   |
| 1434929_at | BC035044      | 2.14 | 6q22.33  | cDNA sequence BC035044                                                                   |
| 1458370_at | Bmp2k         | 2.05 | 5q15     | BMP2 inducible kinase                                                                    |
| 1452350_at | Brd8          | 2.64 | 18q12.2  | bromodomain containing 8                                                                 |
| 1433863_at | Btf3          | 2.29 | 13q32.2  | basic transcription factor 3                                                             |
| 1442494_at | C79242        | 2.00 | 17q21.32 | expressed sequence C79242                                                                |
| 1420442_at | Cacna1s       | 2.09 | 1q12     | calcium channel, voltage-dependent, L type, alpha 1S subunit                             |
| 1441477_at | Calu          | 2.13 | 6p22.1   | calumenin                                                                                |
| 1449434_at | Car3          | 2.69 | 3p25.1   | carbonic anhydrase 3                                                                     |
| 1449591_at | Casp4         | 2.11 | 9p24.1   | caspase 4, apoptosis-related cysteine peptidase                                          |
| 1448659_at | Casp7         | 2.33 | 19q13.43 | caspase 7                                                                                |
| 1451413_at | Cast          | 2.07 | 13q22.1  | calpastatin                                                                              |
| 1439061_at | Ccdc84        | 0.49 | 9p11.2   | coiled-coil domain containing 84                                                         |
| 1419561_at | Ccl3          | 4.60 | 11q14.1  | chemokine (C-C motif) ligand 3                                                           |
| 1417936_at | Ccl9          | 2.99 | 11q14.1  | chemokine (C-C motif) ligand 9                                                           |
| 1441910_x  | Ccne1         | 0.43 | 7p14.1   | cyclin E1                                                                                |
| 1421187_at | Ccr2          | 2.34 | 9q33.2   | chemokine (C-C motif) receptor 2                                                         |
| 1424727_at | Ccr5          | 3.08 | 9q33.2   | chemokine (C-C motif) receptor 5                                                         |
| 1417268_at | Cd14          | 2.93 | 18q12.2  | CD14 antigen                                                                             |
| 1449130_at | Cd1d1         | 2.85 | 3p12.1   | CD1d1 antigen                                                                            |
| 1418770_at | Cd2           | 2.06 | 3q12.3   | CD2 antigen                                                                              |
| 1416034_at | Cd24a         | 2.12 | 10q11.21 | CD24a antigen                                                                            |
| 1416072_at | Cd34          | 3.14 | 1q31.3   | CD34 antigen                                                                             |
| 1419178_at | Cd3g          | 2.03 | 9p11.2   | CD3 antigen, gamma polypeptide                                                           |
| 1428735_at | Cd69          | 2.83 | 6q22.33  | CD69 antigen                                                                             |
| 1425335_at | Cd8a          | 2.12 | 6q13     | CD8 antigen, alpha chain                                                                 |
| 1416066_at | Cd9           | 2.19 | 6q22.31  | CD9 antigen                                                                              |
| 1435338_at | Cdk6          | 2.69 | 5p15.33  | cyclin-dependent kinase 6                                                                |
| 1423233_at | Cebpd         | 2.37 | 16p13.11 | CCAAT/enhancer binding protein (C/EBP), delta                                            |
| 1457712_at | Chd8          | 2.13 | 14q22.1  | chromodomain helicase DNA binding protein 8                                              |
| 1455435_s  | Chdh          | 2.08 | 14q12    | choline dehydrogenase                                                                    |
| 1418920_at | Cldn15        | 2.00 | 5q31.2   | claudin 15                                                                               |
| 1420699_at | Clec7a        | 2.58 | 6q22.33  | C-type lectin domain family 7, member a                                                  |
| 1437458_x  | Clu           | 4.89 | 14q23.3  | clusterin                                                                                |
| 1436836_x  | Cnn3          | 3.42 | 3q13.33  | calponin 3, acidic                                                                       |
| 1423669_at | Col1a1        | 2.96 | 11q21    | collagen, type I, alpha 1                                                                |
| 1416001_a  | Cotl1         | 2.62 | 8q24.12  | coactosin-like 1 (Dictyostelium)                                                         |
| 1440740_at | Ctdspl2       | 2.49 | 2q14.2   | CTD (carboxy-terminal domain, RNA polymerase II, polypeptide A) small phosphatase like 2 |

|                                |       |          |                                                                                                                    |
|--------------------------------|-------|----------|--------------------------------------------------------------------------------------------------------------------|
| 1448471_a_Ctla2a               | 2.04  | 13q21.2  | cytotoxic T lymphocyte-associated protein 2 alpha                                                                  |
| 1416382_at Ctsc                | 3.23  | 7q21.3   | cathepsin C                                                                                                        |
| 1419594_at Ctsg                | 3.29  | 14q22.3  | cathepsin G                                                                                                        |
| 1418365_at Ctsh                | 2.13  | 9q21.33  | cathepsin H                                                                                                        |
| 1418930_at Cxcl10              | 2.00  | 5q15     | chemokine (C-X-C motif) ligand 10                                                                                  |
| 1448710_at Cxcr4               | 0.34  | 1q12     | chemokine (C-X-C motif) receptor 4                                                                                 |
| 1434245_a_Cybasc3              | 2.14  | 19p13.2  | cytochrome b, ascorbate dependent 3                                                                                |
| 1416612_at Cyp1b1              | 2.71  | 17q25.3  | cytochrome P450, family 1, subfamily b, polypeptide 1                                                              |
| 1443490_at D3Ert34e            | 2.34  | 3p11.1   | DNA segment, Chr 3, ERATO Doi 34, expressed                                                                        |
| 1437917_at D530037H12Rik       | 2.03  | 1p31.3   | RIKEN cDNA D530037H12 gene                                                                                         |
| 1442416_at D930001B02          | 2.06  | 12q12    | uncharacterized protein D930001B02                                                                                 |
| 1439952_at Ddx23               | 2.10  | 15q26.2  | DEAD (Asp-Glu-Ala-Asp) box polypeptide 23                                                                          |
| 1438496_a_Ddx26b               | 2.08  | Xp11.22  | DEAD/H (Asp-Glu-Ala-Asp/His) box polypeptide 26B                                                                   |
| 1426438_at Ddx3y               | 2.02  | Yp11.32  | DEAD (Asp-Glu-Ala-Asp) box polypeptide 3, Y-linked                                                                 |
| 1439082_at Ddx50               | 2.04  | 10q21.2  | DEAD (Asp-Glu-Ala-Asp) box polypeptide 50                                                                          |
| 1439114_at Ddx60               | 8.68  | 8q12.3   | DEAD (Asp-Glu-Ala-Asp) box polypeptide 60                                                                          |
| 1452659_at Dek                 | 2.40  | 13q14.13 | DEK oncogene (DNA binding)                                                                                         |
| 1442003_at Diap2               | 2.72  | Xq25     | diaphanous homolog 2 (Drosophila)                                                                                  |
| 1437775_at Dlst                | 2.09  | 12q21.31 | dihydrolipoamide S-succinyltransferase (E2 component of 2-oxo-glutarate complex)                                   |
| 1428781_at Dmkn                | 2.22  | 7p14.3   | dermokine                                                                                                          |
| 1433596_at Dnajc6              | 3.30  | 4q24     | DnaJ (Hsp40) homolog, subfamily C, member 6                                                                        |
| 1435343_at Dock10              | 2.82  | 1p31.1   | dedicator of cytokinesis 10                                                                                        |
| 1425689_at Dpys                | 2.05  | 15q14    | dihydropyrimidinase                                                                                                |
| 1424524_at Dram1               | 2.39  | 10q23.1  | DNA-damage regulated autophagy modulator 1                                                                         |
| 1427610_at Dsp                 | 3.38  | 13q13.3  | desmoplakin                                                                                                        |
| 1456652_at Dtl                 | 2.60  | 1q31.2   | denticleless homolog (Drosophila)                                                                                  |
| 1448830_at Dusp1               | 2.89  | 17q11.2  | dual specificity phosphatase 1                                                                                     |
| 1439673_at E230008O15Rik       | 2.33  | 5p13.3   | RIKEN cDNA E230008O15 gene                                                                                         |
| 1437129_at E330018D03Rik       | 2.15  | 19q13.32 | RIKEN cDNA E330018D03 gene                                                                                         |
| 1421802_at Ear1                | 5.85  | 14q21.2  | eosinophil-associated, ribonuclease A family, member 1                                                             |
| 1422411_s_i_Ear1 /// Ear12 /// | 15.74 | 14q21.2  | eosinophil-associated, ribonuclease A family, member 1 /// eosinophil-associated, ribonuclease A family, member 12 |
| 1449846_at Ear12 /// Ear2 ///  | 5.92  | 14q21.2  | eosinophil-associated, ribonuclease A family, member 12 /// eosinophil-associated, ribonuclease A family, member 2 |
| 1459133_at Edem3               | 2.10  | 1q21.3   | ER degradation enhancer, mannosidase alpha-like 3                                                                  |
| 1417065_at Egr1                | 2.80  | 18q12.2  | early growth response 1                                                                                            |
| 1427682_a_Egr2                 | 4.26  | 10q21.3  | early growth response 2                                                                                            |
| 1417210_at Eif2s3y             | 2.31  | Yp11.32  | eukaryotic translation initiation factor 2, subunit 3, structural gene Y-linked                                    |
| 1417978_at Eif4e3              | 3.23  | 6q16.2   | eukaryotic translation initiation factor 4E member 3                                                               |
| 1422928_at Elane               | 2.31  | 10q22.3  | elastase, neutrophil expressed                                                                                     |
| 1424306_at Elovl4              | 6.36  | 9q21.31  | elongation of very long chain fatty acids (FEN1/Elo2, SUR4/Elo3, yeast)-like 4                                     |
| 1415857_at Emb                 | 2.29  | 13       | embigin                                                                                                            |
| 1433670_at Emp2                | 2.86  | 16p13.2  | epithelial membrane protein 2                                                                                      |
| 1448136_at Enpp2               | 5.72  | 15q21.3  | ectonucleotide pyrophosphatase/phosphodiesterase 2                                                                 |
| 1449136_at Epx                 | 2.92  | 11q14.2  | eosinophil peroxidase                                                                                              |
| 1457147_at Etl4                | 2.02  | 2p24.1   | enhancer trap locus 4                                                                                              |
| 1443894_at Evi2a               | 2.44  | 11q14.1  | Ecotropic viral integration site 2a                                                                                |
| 1443117_at Eya1                | 2.07  | 1p36.21  | eyes absent 1 homolog (Drosophila)                                                                                 |
| 1449305_at F10                 | 2.15  | 8p22     | coagulation factor X                                                                                               |
| 1448929_at F13a1               | 2.55  | 13q13.3  | coagulation factor XIII, A1 subunit                                                                                |
| 1416022_at Fabp5               | 2.36  | 18p11.23 | fatty acid binding protein 5, epidermal                                                                            |

|                              |      |          |                                                                                                                                   |
|------------------------------|------|----------|-----------------------------------------------------------------------------------------------------------------------------------|
| 1416021_a_Fabp5 /// Gm3601   | 2.32 | 18p11.23 | fatty acid binding protein 5, epidermal /// predicted gene 3601                                                                   |
| 1424683_at Fam134b           | 2.14 | 15q12    | family with sequence similarity 134, member B                                                                                     |
| 1434359_at Fam65b            | 2.06 | 13q12.12 | family with sequence similarity 65, member B                                                                                      |
| 1439006_x_Fam70a             | 0.42 | Xp21.1   | family with sequence similarity 70, member A                                                                                      |
| 1436487_x_Fbxw2              | 2.18 | 2p22.3   | F-box and WD-40 domain protein 2                                                                                                  |
| 1435477_s_iFcgr2b            | 2.10 | 1q24.3   | Fc receptor, IgG, low affinity IIb                                                                                                |
| 1448620_at Fcgr3             | 2.76 | 1q25.1   | Fc receptor, IgG, low affinity III                                                                                                |
| 1452410_a_Fes                | 2.16 | 7q21.12  | feline sarcoma oncogene                                                                                                           |
| 1427526_at Fgfr1op2          | 2.06 | 6q24.3   | FGFR1 oncogene partner 2                                                                                                          |
| 1426642_at Fn1               | 2.31 | 1p31.1   | fibronectin 1                                                                                                                     |
| 1422134_at Fosb              | 4.86 | 7p21.1   | FBJ osteosarcoma oncogene B                                                                                                       |
| 1438169_a_Frmd4b             | 3.03 | 6q16.1   | FERM domain containing 4B                                                                                                         |
| 1455831_at Fus               | 2.05 | 7q33     | fusion, derived from t(12;16) malignant liposarcoma (human)                                                                       |
| 1455021_at Gabbbr1           | 2.02 | 17q12    | gamma-aminobutyric acid (GABA) B receptor, 1                                                                                      |
| 1449519_at Gadd45a           | 2.57 | 6q12     | growth arrest and DNA-damage-inducible 45 alpha                                                                                   |
| 1423569_at Gatm              | 2.41 | 2q14.3   | glycine amidinotransferase (L-arginine:glycine amidinotransferase)                                                                |
| 1435906_x_Gbp2               | 2.48 | 3q23     | guanylate binding protein 2                                                                                                       |
| 1418392_a_Gbp3               | 2.05 | 3q23     | guanylate binding protein 3                                                                                                       |
| 1425156_at Gbp7              | 3.16 | 3q23     | guanylate binding protein 7                                                                                                       |
| 1460431_at Gcnt1             | 2.15 | 19p13.11 | glucosaminyl (N-acetyl) transferase 1, core 2                                                                                     |
| 1435748_at Gda               | 2.90 | 19p12    | guanine deaminase                                                                                                                 |
| 1420342_at Gdap10            | 2.24 | 12p11.1  | ganglioside-induced differentiation-associated-protein 10                                                                         |
| 1456762_at Gimap6            | 2.51 | 6p12.3   | GTPase, IMAP family member 6                                                                                                      |
| 1456061_at Gimap8            | 2.63 | 6p12.3   | GTPase, IMAP family member 8                                                                                                      |
| 1440945_at Glcci1            | 2.03 | 6p24.3   | glucocorticoid induced transcript 1                                                                                               |
| 1424927_at Glipr1            | 2.23 | 10q25.1  | GLI pathogenesis-related 1 (glioma)                                                                                               |
| 1436687_x_Gm10193 /// Zfp7   | 3.08 | 15q14    | predicted gene 10193 /// zinc finger protein 706                                                                                  |
| 1460351_at Gm12854 /// S10C  | 2.08 | 3q11.1   | predicted gene 12854 /// S100 calcium binding protein A11 (calgizzarin)                                                           |
| 1448775_at Gm16340 /// Ifi20 | 2.29 | 1q25.1   | predicted gene 16340 /// interferon activated gene 203 /// interferon-activable protein 203-like /// uncharacterized LOC100862473 |
| 1455715_at Gm1976            | 0.48 | 17       | predicted gene 1976                                                                                                               |
| 1425421_at Gm20274           | 2.90 | 7q32.2   | predicted gene, 20274                                                                                                             |
| 1453413_at Gnas              | 2.45 | 2q31.1   | GNAS (guanine nucleotide binding protein, alpha stimulating) complex locus                                                        |
| 1420394_s_iGp49a /// Lilrb4  | 2.46 | 10q11.23 | glycoprotein 49 A /// leukocyte immunoglobulin-like receptor, subfamily B, member 4                                               |
| 1429639_at Gpcpd1            | 2.30 | 2q21.1   | glycerophosphocholine phosphodiesterase GDE1 homolog (S. cerevisiae)                                                              |
| 1438195_at Gpd1l             | 2.35 | 9q31.3   | glycerol-3-phosphate dehydrogenase 1-like                                                                                         |
| 1458023_at Gpkow             | 2.29 | Xp22.31  | G patch domain and KOW motifs                                                                                                     |
| 1438439_at Gpr171            | 2.08 | 3p14.2   | G protein-coupled receptor 171                                                                                                    |
| 1449175_at Gpr65             | 2.58 | 12q23.1  | G-protein coupled receptor 65                                                                                                     |
| 1455000_at Gpr68             | 2.24 | 12q23.2  | G protein-coupled receptor 68                                                                                                     |
| 1434728_at Gria3             | 3.39 | Xp11.4   | glutamate receptor, ionotropic, AMPA3 (alpha 3)                                                                                   |
| 1446550_at Gspt1             | 2.13 | 16p13.13 | G1 to S phase transition 1                                                                                                        |
| 1416416_x_Gstm1              | 3.60 | 3q13.12  | glutathione S-transferase, mu 1                                                                                                   |
| 1424835_at Gstm4             | 2.41 | 3q13.12  | glutathione S-transferase, mu 4                                                                                                   |
| 1442305_at Gtppp2            | 2.12 | 17q21.32 | GTP binding protein 2                                                                                                             |
| 1423016_a_Gypa               | 2.44 | 8q21.13  | glycophorin A                                                                                                                     |
| 1419060_at Gzmb              | 2.18 | 14q22.3  | granzyme B                                                                                                                        |
| 1460184_at Hadh              | 2.35 | 3q22.1   | hydroxyacyl-Coenzyme A dehydrogenase                                                                                              |
| 1417714_x_Hba-a1 /// Hba-a2  | 2.20 | 11p13    | hemoglobin alpha, adult chain 1 /// hemoglobin alpha, adult chain 2                                                               |
| 1438037_at Herc6             | 2.24 | 6p11.2   | hect domain and RLD 6                                                                                                             |

|            |                     |      |          |                                                                                                                                         |
|------------|---------------------|------|----------|-----------------------------------------------------------------------------------------------------------------------------------------|
| 1423319_at | Hhex                | 2.09 | 19q13.12 | hematopoietically expressed homeobox                                                                                                    |
| 1428433_at | Hipk2               | 2.37 | 6p21.2   | homeodomain interacting protein kinase 2                                                                                                |
| 1425398_at | Hist1h2bf /// Hist1 | 2.25 | 13q12.11 | histone cluster 1, H2bf /// histone cluster 1, H2bj /// histone cluster 1, H2bl /// histone cluster 1, H2bn /// histone cluster 1, H2bq |
| 1442798_x  | Hk3                 | 2.35 | 13q14.3  | hexokinase 3                                                                                                                            |
| 1431777_a  | Hmgn3               | 2.40 | 9q21.31  | high mobility group nucleosomal binding domain 3                                                                                        |
| 1457568_at | Hnrnpd              | 2.39 | 5q21.1   | heterogeneous nuclear ribonucleoprotein D                                                                                               |
| 1455626_at | Hoxa9               | 2.58 | 6p12.2   | homeobox A9                                                                                                                             |
| 1448881_at | Hp                  | 3.92 | 8q23.2   | haptoglobin                                                                                                                             |
| 1434642_at | Hsd17b11            | 2.19 | 5q21.2   | hydroxysteroid (17-beta) dehydrogenase 11                                                                                               |
| 1430026_at | Hspa13              | 0.45 | 16q23.1  | heat shock protein 70 family, member 13                                                                                                 |
| 1422943_a  | Hspb1               | 4.02 | 5q31.2   | heat shock protein 1                                                                                                                    |
| 1422433_s  | Ildh1               | 2.14 | 1p31.3   | isocitrate dehydrogenase 1 (NADP+), soluble                                                                                             |
| 1454757_s  | Ifi2711             | 2.03 | 12q23.3  | interferon, alpha-inducible protein 27 like 1                                                                                           |
| 1426276_at | Ifih1               | 2.68 | 2p15     | interferon induced with helicase C domain 1                                                                                             |
| 1424254_at | Ifitm1              | 3.05 | 7q36.1   | interferon induced transmembrane protein 1                                                                                              |
| 1440865_at | Ifitm6              | 2.96 | 7q36.1   | interferon induced transmembrane protein 6                                                                                              |
| 1425947_at | Ifng                | 2.79 | 10q25.3  | interferon gamma                                                                                                                        |
| 1423756_s  | Igfbp4              | 2.28 | 11q22.1  | insulin-like growth factor binding protein 4                                                                                            |
| 1421408_at | Igsf6               | 2.17 | 7q32.1   | immunoglobulin superfamily, member 6                                                                                                    |
| 1419042_at | Iigp1               | 2.18 | 18q21.33 | interferon inducible GTPase 1                                                                                                           |
| 1437542_at | Ikzf2               | 2.14 | 1p31.2   | IKAROS family zinc finger 2                                                                                                             |
| 1447858_x  | Il4ra               | 3.63 | 7q33     | interleukin 4 receptor, alpha                                                                                                           |
| 1433885_at | Iqgap2              | 2.37 | 13q32.1  | IQ motif containing GTPase activating protein 2                                                                                         |
| 1433634_at | Irf2bp2             | 2.66 | 8q24.21  | interferon regulatory factor 2 binding protein 2                                                                                        |
| 1416714_at | Irf8                | 2.29 | 8q24.13  | interferon regulatory factor 8                                                                                                          |
| 1458996_at | Itga5               | 3.67 | 15       | integrin alpha 5 (fibronectin receptor alpha)                                                                                           |
| 1417279_at | Itpr1               | 2.71 | 6q21     | inositol 1,4,5-trisphosphate receptor 1                                                                                                 |
| 1452809_at | Izumo4              | 2.62 | 10q22.3  | IZUMO family member 4                                                                                                                   |
| 1433894_at | Jazf1               | 2.77 | 6p12.2   | JAZF zinc finger 1                                                                                                                      |
| 1448694_at | Jun                 | 2.34 | 4q22.2   | Jun oncogene                                                                                                                            |
| 1457062_at | Kansl1              | 2.10 | 11q22.3  | KAT8 regulatory NSL complex subunit 1                                                                                                   |
| 1436466_at | Khny1               | 2.36 | 14q22.3  | KH and NYN domain containing                                                                                                            |
| 1447853_x  | Kif13a              | 5.34 | ---      | Kinesin family member 13A                                                                                                               |
| 1455182_at | Kif1b               | 2.32 | 4q31.23  | kinesin family member 1B                                                                                                                |
| 1451783_a  | Kifap3              | 2.13 | 1q24.1   | kinesin-associated protein 3                                                                                                            |
| 1448890_at | Klf2                | 3.42 | 8q21.11  | Kruppel-like factor 2 (lung)                                                                                                            |
| 1454666_at | Klf3                | 2.37 | 5q12.3   | Kruppel-like factor 3 (basic)                                                                                                           |
| 1417395_at | Klf4                | 4.30 | 4q12     | Kruppel-like factor 4 (gut)                                                                                                             |
| 1427742_a  | Klf6                | 2.17 | 13p12    | Kruppel-like factor 6                                                                                                                   |
| 1456341_a  | Klf9                | 2.27 | 19p12    | Kruppel-like factor 9                                                                                                                   |
| 1415837_at | Klk1                | 2.58 | 7p12.1   | kallikrein 1                                                                                                                            |
| 1457722_at | Klrb1f              | 2.82 | 6q22.33  | killer cell lectin-like receptor subfamily B member 1F                                                                                  |
| 1460245_at | Klrd1               | 2.01 | 6q22.33  | killer cell lectin-like receptor, subfamily D, member 1                                                                                 |
| 1458642_at | Klre1               | 2.28 | 6q22.33  | killer cell lectin-like receptor family E member 1                                                                                      |
| 1428730_at | Krit1               | 2.02 | 5p15.33  | KRIT1, ankyrin repeat containing                                                                                                        |
| 1449014_at | Lactb               | 2.16 | 9q13     | lactamase, beta                                                                                                                         |
| 1460651_at | Lat                 | 2.24 | 7q33     | linker for activation of T cells                                                                                                        |
| 1448550_at | Lbp                 | 2.93 | 2q24.1   | lipopolysaccharide binding protein                                                                                                      |
| 1418641_at | Lcp2                | 2.26 | 11p13    | lymphocyte cytosolic protein 2                                                                                                          |

|            |                  |      |          |                                                                                    |
|------------|------------------|------|----------|------------------------------------------------------------------------------------|
| 1426808_at | Lgals3           | 2.11 | 14q21.3  | lectin, galactose binding, soluble 3                                               |
| 1454984_at | Lifr             | 2.45 | 15p12    | leukemia inhibitory factor receptor                                                |
| 1426260_a  | LOC100048662 /// | 2.70 | 1p22.2   | UDP-glucuronosyltransferase 1-9-like ///                                           |
| 1436766_at | LOC100861853 /// | 2.67 | 6p21.2   | uncharacterized LOC100861853 ///                                                   |
| 1425226_x  | LOC665506        | 2.27 | 6p21.1   | T-cell receptor beta-2 chain C region-like                                         |
| 1446316_at | Lpin2            | 2.05 | 17q25.1  | lipin 2                                                                            |
| 1439821_at | Lrp2bp           | 2.10 | 8q11.1   | Lrp2 binding protein                                                               |
| 1425548_a  | Lst1             | 2.52 | 17q12    | leukocyte specific transcript 1                                                    |
| 1436767_at | Luc7l2           | 2.70 | 6p21.2   | LUC7-like 2 (S. cerevisiae)                                                        |
| 1417185_at | Ly6a             | 2.45 | 15q24.1  | lymphocyte antigen 6 complex, locus A                                              |
| 1422903_at | Ly86             | 2.08 | 13q13.3  | lymphocyte antigen 86                                                              |
| 1436202_at | Malat1           | 3.87 | 19p13.3  | metastasis associated lung adenocarcinoma transcript 1 (non-coding RNA)            |
| 1428024_at | Map1lc3b         | 2.96 | 8q24.13  | microtubule-associated protein 1 light chain 3 beta                                |
| 1429963_at | Mapk6            | 2.09 | 9q21.13  | mitogen-activated protein kinase 6                                                 |
| 1442382_at | Mast4            | 2.29 | 13q33.1  | microtubule associated serine/threonine kinase family member 4                     |
| 1441987_at | Mbd5             | 2.01 | 2p16.3   | methyl-CpG binding domain protein 5                                                |
| 1433532_a  | Mbp              | 2.56 | 18       | myelin basic protein                                                               |
| 1427425_at | Mcart1           | 2.28 | 4p12     | mitochondrial carrier triple repeat 1                                              |
| 1427040_at | Mdfic            | 2.42 | 6p22.3   | MyoD family inhibitor domain containing                                            |
| 1434447_at | Met              | 3.07 | 6p22.3   | met proto-oncogene                                                                 |
| 1451247_at | Mfsd1            | 2.30 | 3p14.1   | major facilitator superfamily domain containing 1                                  |
| 1454119_at | Mknk1            | 3.35 | 4q26     | MAP kinase-interacting serine/threonine kinase 1                                   |
| 1449366_at | Mmp8             | 2.73 | 9p24.1   | matrix metalloproteinase 8                                                         |
| 1440919_at | Mob3c            | 2.28 | 4q26     | MOB kinase activator 3C                                                            |
| 1433785_at | Mobp             | 2.17 | 9q33.1   | myelin-associated oligodendrocytic basic protein                                   |
| 1427076_at | Mpeg1            | 2.89 | 19p13.2  | macrophage expressed gene 1                                                        |
| 1415960_at | Mpo              | 3.15 | 11q14.2  | myeloperoxidase                                                                    |
| 1416236_a  | Mpzl2            | 2.30 | 9p11.2   | myelin protein zero-like 2                                                         |
| 1443264_at | Ms4a2            | 2.93 | 19p13.2  | membrane-spanning 4-domains, subfamily A, member 2                                 |
| 1420572_at | Ms4a3            | 2.23 | 19p13.2  | membrane-spanning 4-domains, subfamily A, member 3                                 |
| 1450291_s  | iMs4a4c          | 3.09 | 19p13.2  | membrane-spanning 4-domains, subfamily A, member 4C                                |
| 1418826_at | Ms4a6b           | 2.28 | 19p13.2  | membrane-spanning 4-domains, subfamily A, member 6B                                |
| 1430539_at | Mxra7            | 4.08 | 11q23.3  | matrix-remodelling associated 7                                                    |
| 1421317_x  | Myb              | 3.02 | 10p12.31 | myeloblastosis oncogene                                                            |
| 1429525_s  | iMyo1f           | 2.82 | 17q12    | myosin IF                                                                          |
| 1433942_at | Myo6             | 2.13 | 9q21.2   | myosin VI                                                                          |
| 1460273_a  | Naip2            | 2.10 | 13q32.3  | NLR family, apoptosis inhibitory protein 2                                         |
| 1421525_a  | Naip5            | 3.26 | 13q32.3  | NLR family, apoptosis inhibitory protein 5                                         |
| 1423590_at | Napsa            | 2.16 | 7p12.1   | napsin A aspartic peptidase                                                        |
| 1451767_at | Ncf1             | 4.62 | 5q31.1   | neutrophil cytosolic factor 1                                                      |
| 1456174_x  | Ndrp1            | 2.27 | 15q22.31 | N-myc downstream regulated gene 1                                                  |
| 1428083_at | Neat1            | 3.72 | 19p13.3  | nuclear paraspeckle assembly transcript 1 (non-protein coding)                     |
| 1452001_at | Nfe2             | 2.83 | 15       | nuclear factor, erythroid derived 2                                                |
| 1417483_at | Nfkbiz           | 4.08 | 16q12.2  | nuclear factor of kappa light polypeptide gene enhancer in B cells inhibitor, zeta |
| 1428600_at | Nin              | 2.91 | 12q15    | ninein                                                                             |
| 1450753_at | Nkg7             | 2.78 | 7p12.1   | natural killer cell group 7 sequence                                               |
| 1436136_at | Noc2l            | 2.61 | ---      | nucleolar complex associated 2 homolog (S. cerevisiae)                             |
| 1416505_at | Nr4a1            | 2.33 | 15q26.3  | nuclear receptor subfamily 4, group A, member 1                                    |
| 1440263_at | Nrp              | 2.02 | 12q21.32 | neural regeneration protein                                                        |

|            |          |       |          |                                                                     |
|------------|----------|-------|----------|---------------------------------------------------------------------|
| 1418084_at | Nrp1     | 2.28  | 8q24.21  | neuropilin 1                                                        |
| 1418355_at | Nucb2    | 4.29  | 7q31.32  | nucleobindin 2                                                      |
| 1452815_at | P2ry10   | 2.01  | Xq22.3   | purinergic receptor P2Y, G-protein coupled 10                       |
| 1453840_at | Pabpc1   | 2.44  | 15q14    | poly(A) binding protein, cytoplasmic 1                              |
| 1434510_at | Papss2   | 2.46  | 19q13.11 | 3'-phosphoadenosine 5'-phosphosulfate synthase 2                    |
| 1426774_at | Parp12   | 2.38  | 6p21.2   | poly (ADP-ribose) polymerase family, member 12                      |
| 1451474_a  | Parp8    | 2.57  | 13       | poly (ADP-ribose) polymerase family, member 8                       |
| 1442700_at | Pde4b    | 4.13  | 4q24     | phosphodiesterase 4B, cAMP specific                                 |
| 1457264_at | Phf20l1  | 2.26  | 15q22.31 | PHD finger protein 20-like 1                                        |
| 1453145_at | Pisd-ps3 | 2.02  | 11p15.4  | phosphatidylserine decarboxylase, pseudogene 3                      |
| 1451611_at | Pla2g16  | 2.13  | 19p13.2  | phospholipase A2, group XVI                                         |
| 1451335_at | Plac8    | 2.26  | 5q21.1   | placenta-specific 8                                                 |
| 1442235_at | Plagl2   | 2.78  | 2q23.3   | Pleiomorphic adenoma gene-like 2                                    |
| 1422138_at | Plau     | 3.54  | 14q11.2  | plasminogen activator, urokinase                                    |
| 1416178_a  | Plekhb1  | 2.11  | 7q31.1   | pleckstrin homology domain containing, family B (evectins) member 1 |
| 1451718_at | Plp1     | 5.81  | Xq26.2   | proteolipid protein (myelin) 1                                      |
| 1455737_at | Ppm1h    | 2.04  | 10q26.12 | protein phosphatase 1H (PP2C domain containing)                     |
| 1420015_s  | iPpt1    | 2.14  | 4q27     | palmitoyl-protein thioesterase 1                                    |
| 1422873_at | Prg2     | 3.49  | 2p11.2   | proteoglycan 2, bone marrow                                         |
| 1420611_at | Prkacb   | 2.34  | 3q24     | protein kinase, cAMP dependent, catalytic, beta                     |
| 1442256_at | Prkcd    | 2.33  | 14q12    | protein kinase C, delta                                             |
| 1434248_at | Prkch    | 2.79  | 12q21.1  | protein kinase C, eta                                               |
| 1432631_at | Prrc1    | 2.31  | 18q21.32 | proline-rich coiled-coil 1                                          |
| 1419669_at | Prtn3    | 2.87  | 10q22.3  | proteinase 3                                                        |
| 1438454_at | Pten     | 2.12  | 19q13.11 | phosphatase and tensin homolog                                      |
| 1422124_a  | Ptprc    | 2.66  | 1q12     | protein tyrosine phosphatase, receptor type, C                      |
| 1417741_at | Pygl     | 2.29  | 12q15    | liver glycogen phosphorylase                                        |
| 1416527_at | Rab32    | 2.16  | 10p14    | RAB32, member RAS oncogene family                                   |
| 1456980_at | Rab44    | 2.86  | 17q11.2  | RAB44, member RAS oncogene family                                   |
| 1417481_at | Ramp1    | 2.62  | 1p22.1   | receptor (calcitonin) activity modifying protein 1                  |
| 1440104_at | Ranbp2   | 2.33  | 10q21.1  | RAN binding protein 2                                               |
| 1458591_at | Rasef    | 16.51 | 4q13.3   | RAS and EF hand domain containing                                   |
| 1439622_at | Rassf4   | 2.10  | 6q22.1   | Ras association (RalGDS/AF-6) domain family member 4                |
| 1456260_at | Rbbp4    | 2.01  | 4q28.2   | retinoblastoma binding protein 4                                    |
| 1442745_x  | Rbm39    | 2.80  | 2q24.1   | RNA binding motif protein 39                                        |
| 1420398_at | Rgs18    | 2.25  | 1q21.1   | regulator of G-protein signaling 18                                 |
| 1447830_s  | iRgs2    | 3.68  | 1q21.1   | regulator of G-protein signaling 2                                  |
| 1443768_at | Rhoa     | 2.89  | ---      | Ras homolog gene family, member A                                   |
| 1459042_at | Rims3    | 3.52  | 4q26     | regulating synaptic membrane exocytosis 3                           |
| 1456689_at | Rnf10    | 2.36  | 5q23.1   | ring finger protein 10                                              |
| 1425282_at | Rnf144b  | 3.16  | 13q14.13 | ring finger protein 144B                                            |
| 1448079_at | Rnf166   | 2.22  | ---      | ring finger protein 166                                             |
| 1437359_at | Rnps1    | 2.15  | 17q11.1  | ribonucleic acid binding protein S1                                 |
| 1436058_at | Rsad2    | 2.32  | 12p11.23 | radical S-adenosyl methionine domain containing 2                   |
| 1435284_at | Rtn4     | 2.19  | 11p14.1  | reticulon 4                                                         |
| 1422864_at | Runx1    | 2.15  | 16       | runt related transcription factor 1                                 |
| 1424704_at | Runx2    | 2.13  | 17q21.31 | runt related transcription factor 2                                 |
| 1456642_x  | S100a10  | 2.25  | 3q11.1   | S100 calcium binding protein A10 (calpactin)                        |
| 1424542_at | S100a4   | 2.88  | 3p11.1   | S100 calcium binding protein A4                                     |

|                             |      |          |                                                                                             |
|-----------------------------|------|----------|---------------------------------------------------------------------------------------------|
| 1419394_s_iS100a8           | 5.97 | 3p11.1   | S100 calcium binding protein A8 (calgranulin A)                                             |
| 1448756_at S100a9           | 5.03 | 3p11.1   | S100 calcium binding protein A9 (calgranulin B)                                             |
| 1443721_x_Sbno2             | 2.24 | 10q22.3  | strawberry notch homolog 2 (Drosophila)                                                     |
| 1426775_s_iScamp1           | 2.28 | 13q31.3  | secretory carrier membrane protein 1                                                        |
| 1454704_at Scarb2           | 2.42 | 5q15     | scavenger receptor class B, member 2                                                        |
| 1439204_at Scn3a            | 2.39 | 2p14     | sodium channel, voltage-gated, type III, alpha                                              |
| 1440378_at Sec11c           | 2.47 | 18q22.1  | SEC11 homolog C ( <i>S. cerevisiae</i> )                                                    |
| 1419480_at Sell             | 2.04 | 1q24.1   | selectin, lymphocyte                                                                        |
| 1416318_at Serpinb1a        | 3.64 | 13q13.1  | serine (or cysteine) peptidase inhibitor, clade B, member 1a                                |
| 1438675_at Sfswap           | 2.46 | 5q23.3   | splicing factor, suppressor of white-apricot homolog ( <i>Drosophila</i> )                  |
| 1416041_at Sgk1             | 2.76 | 10p12.31 | serum/glucocorticoid regulated kinase 1                                                     |
| 1429029_at Sgms2            | 3.92 | 3q22.1   | sphingomyelin synthase 2                                                                    |
| 1434204_x_Shmt2             | 0.36 | 10q26.13 | serine hydroxymethyltransferase 2 (mitochondrial)                                           |
| 1440647_at Sipa1l1          | 2.23 | 12q21.31 | signal-induced proliferation-associated 1 like 1                                            |
| 1452717_at Slc25a24         | 2.87 | 3q13.13  | solute carrier family 25 (mitochondrial carrier, phosphate carrier), member 24              |
| 1434897_a_Slc25a4           | 2.33 | 8q11.1   | solute carrier family 25 (mitochondrial carrier, adenine nucleotide translocator), member 4 |
| 1418843_at Slc30a4          | 2.04 | 2q14.3   | solute carrier family 30 (zinc transporter), member 4                                       |
| 1454764_s_iSlc38a1          | 2.56 | 15q26.2  | solute carrier family 38, member 1                                                          |
| 1438559_x_Slc44a2           | 2.18 | 9p21.3   | solute carrier family 44, member 2                                                          |
| 1430932_at Slc9a8           | 2.55 | 2q24.3   | solute carrier family 9 (sodium/hydrogen exchanger), member 8                               |
| 1437870_at Slco4c1          | 2.13 | 1p21.3   | solute carrier organic anion transporter family, member 4C1                                 |
| 1442497_at Smchd1           | 2.12 | 17q25.1  | SMC hinge domain containing 1                                                               |
| 1429011_x_Snrnp70           | 3.23 | 7p12.1   | small nuclear ribonucleoprotein 70 (U1)                                                     |
| 1449109_at Socs2            | 2.54 | 10q23.33 | suppressor of cytokine signaling 2                                                          |
| 1456212_x_Socs3             | 2.52 | 11q23.3  | suppressor of cytokine signaling 3                                                          |
| 1426258_at Sorl1            | 2.11 | 9p12     | sortilin-related receptor, LDLR class A repeats-containing                                  |
| 1433575_at Sox4             | 3.25 | 13q12.3  | SRV-box containing gene 4                                                                   |
| 1458056_at Srek1            | 2.17 | 13q33.1  | splicing regulatory glutamine/lysine-rich protein 1                                         |
| 1450878_at Sri              | 2.05 | 5p15.31  | sorcin                                                                                      |
| 1436871_at Srsf7            | 2.40 | 17q25.3  | serine/arginine-rich splicing factor 7                                                      |
| 1430165_at Stk17b           | 2.77 | 1p32.3   | serine/threonine kinase 17b (apoptosis-inducing)                                            |
| 1438591_at Strada           | 2.35 | 11q22.3  | STE20-related kinase adaptor alpha                                                          |
| 1439238_at Sun2             | 2.12 | 15q25.1  | Sad1 and UNC84 domain containing 2                                                          |
| 1429146_at Svip             | 2.14 | 7p11.1   | small VCP/p97-interacting protein                                                           |
| 1435078_at Tanc2            | 2.86 | 11q22.3  | tetrapeptide repeat, ankyrin repeat and coiled-coil containing 2                            |
| 1428508_at Tbc1d2b          | 3.14 | 9q21.33  | TBC1 domain family, member 2B                                                               |
| 1418171_at Tceal8           | 2.28 | Xq26.2   | transcription elongation factor A (SII)-like 8                                              |
| 1426772_x_Tcrb-J            | 2.28 | 6p21.1   | T cell receptor beta, joining region                                                        |
| 1449831_at Tctex1d1         | 3.35 | 4q24     | Tctex1 domain containing 1                                                                  |
| 1443527_at Terf1            | 2.02 | 1p36.21  | telomeric repeat binding factor 1                                                           |
| 1418744_s_iTesc             | 2.07 | 5q23.1   | tescalcin                                                                                   |
| 1438781_at Tet2             | 3.01 | 3q22.1   | Tet methylcytosine dioxygenase 2                                                            |
| 1419537_at Tfec             | 2.57 | 6p22.3   | transcription factor EC                                                                     |
| 1420895_at Tgfbfr1          | 2.02 | 4p12     | transforming growth factor, beta receptor I                                                 |
| 1449009_at Tgtp1 /// Tgtp2  | 2.76 | 11p11.2  | T cell specific GTPase 1 /// T cell specific GTPase 2                                       |
| 1421811_at Thbs1 /// X99384 | 2.51 | 2q14.1   | thrombospondin 1 /// cDNA sequence X99384                                                   |
| 1428010_at Timm9            | 2.08 | 12q21.1  | translocase of inner mitochondrial membrane 9 homolog (yeast)                               |
| 1417219_s_iTmsb10           | 2.95 | 6q13     | thymosin, beta 10                                                                           |
| 1415906_at Tmsb4x           | 2.39 | X        | thymosin, beta 4, X chromosome                                                              |

|                               |      |          |                                                                                                            |
|-------------------------------|------|----------|------------------------------------------------------------------------------------------------------------|
| 1452948_at Tnfaip8l2          | 2.23 | 3q11.2   | tumor necrosis factor, alpha-induced protein 8-like 2                                                      |
| 1450731_s_Tnfrsf21            | 3.99 | 17q21.31 | tumor necrosis factor receptor superfamily, member 21                                                      |
| 1421744_at Tnfsf4             | 2.29 | 1q23.3   | tumor necrosis factor (ligand) superfamily, member 4                                                       |
| 1422924_at Tnfsf9             | 3.04 | 17q22    | tumor necrosis factor (ligand) superfamily, member 9                                                       |
| 1438495_at Top1               | 3.16 | 2q24.2   | topoisomerase (DNA) I                                                                                      |
| 1445452_at Traf1              | 2.57 | 2p22.3   | TNF receptor-associated factor 1                                                                           |
| 1460271_at Trem3              | 2.31 | 17q21.33 | triggering receptor expressed on myeloid cells 3                                                           |
| 1416927_at Trp53inp1          | 2.14 | 4p16.1   | transformation related protein 53 inducible nuclear protein 1                                              |
| 1430485_at Trpc2              | 2.00 | 7q31.1   | transient receptor potential cation channel, subfamily C, member 2                                         |
| 1439989_at Tsc1               | 2.29 | 2p23.2   | tuberous sclerosis 1                                                                                       |
| 1454758_a_Tsc22d1             | 2.20 | 14q24.3  | TSC22 domain family, member 1                                                                              |
| 1430043_at Ttc19              | 2.40 | 11q12.3  | tetratricopeptide repeat domain 19                                                                         |
| 1423672_at Ttc30b             | 2.36 | 2p12     | tetratricopeptide repeat domain 30B                                                                        |
| 1437906_x_Txn1                | 3.12 | 18q22.1  | thioredoxin-like 1                                                                                         |
| 1439477_at Ube2b              | 2.71 | 11p11.11 | ubiquitin-conjugating enzyme E2B                                                                           |
| 1430317_at Ube2j2             | 2.48 | 4q31.3   | ubiquitin-conjugating enzyme E2J 2                                                                         |
| 1457454_at Usp47              | 2.07 | 7q31.31  | ubiquitin specific peptidase 47                                                                            |
| 1448600_s_Vav3                | 2.11 | 3q13.13  | vav 3 oncogene                                                                                             |
| 1450641_at Vim                | 3.10 | 2p24.3   | vimentin                                                                                                   |
| 1451127_at Vopp1              | 2.19 | 6p11.2   | vesicular, overexpressed in cancer, prosurvival protein 1                                                  |
| 1449347_a_Xlr4a /// Xlr4b /// | 2.27 | Xq13.1   | X-linked lymphocyte-regulated 4A /// X-linked lymphocyte-regulated 4B /// X-linked lymphocyte-regulated 4C |
| 1446512_at Zc3h15             | 2.01 | 2p11.2   | zinc finger CCCH-type containing 15                                                                        |
| 1434401_at Zcchc2             | 2.47 | 1p13.3   | zinc finger, CCHC domain containing 2                                                                      |
| 1422748_at Zeb2               | 2.02 | 2p21     | zinc finger E-box binding homeobox 2                                                                       |
| 1417010_at Zfp238             | 2.33 | 1q25.2   | zinc finger protein 238                                                                                    |
| 1438873_at Zfp389             | 2.24 | 13q12.11 | zinc finger protein 389                                                                                    |
| 1445827_at Zmynd8             | 2.25 | 2q24.3   | Zinc finger, MYND-type containing 8                                                                        |
