# Supplementary material for: DNMTi/HDACi combined epigenetic targeted treatment induces reprogramming of myeloma cells in the direction of normal plasma cells
Source: PubMed Central journal article supplement — Br J Cancer. 2018 Mar 2;118(8):1062–73. doi: 10.1038/s41416-018-0025-x (PMC5931098; doi:10.1038/s41416-018-0025-x), 2018-03-02
Supplement: 41416_2018_25_MOESM6_ESM.pdf [file 41416_2018_25_MOESM6_ESM.pdf]

**TABLE S5: Prognostic value of Decitabine/TSA deregulated genes in primary MMC of newly-diagnosed patients**

| Probeset                     | NAME     | P.logRank after Benjamini-Hochberg multiple testing correction | Hazard ratio |
|------------------------------|----------|----------------------------------------------------------------|--------------|
| <b>Bad prognostic genes</b>  |          |                                                                |              |
| 202411_at                    | IFI27    | 0.0066                                                         | 3.02         |
| 218543_s_at                  | PARP12   | 0.015                                                          | 2.99         |
| 242625_at                    | RSAD2    | 0.026                                                          | 2.7          |
| 210432_s_at                  | SCN3A    | 0.009                                                          | 3.180        |
| <b>Good prognostic genes</b> |          |                                                                |              |
| 224583_at                    | COTL1    | 0.035                                                          | 0.44         |
| 225407_at                    | MBP      | 0.017                                                          | 0.39         |
| 219062_s_at                  | ZCCHC2   | 0.023                                                          | 0.37         |
| 202436_s_at                  | CYP1B1   | 0.0098                                                         | 0.35         |
| 212509_s_at                  | MXRA7    | 0.011                                                          | 0.33         |
| 228726_at                    | SERPINB1 | 0.011                                                          | 0.31         |
| 201243_s_at                  | ATP1B1   | 0.014                                                          | 0.31         |
| 202437_s_at                  | CYP1B1   | 0.005                                                          | 0.290        |
| 212268_at                    | SERPINB1 | 0.010                                                          | 0.350        |
| 223217_s_at                  | NFKBIZ   | 0.050                                                          | 0.450        |
| 204730_at                    | RIMS3    | 0.050                                                          | 0.470        |
