# Supplementary material for: DNMTi/HDACi combined epigenetic targeted treatment induces reprogramming of myeloma cells in the direction of normal plasma cells
Source: PubMed Central journal article supplement — Br J Cancer. 2018 Mar 2;118(8):1062–73. doi: 10.1038/s41416-018-0025-x (PMC5931098; doi:10.1038/s41416-018-0025-x), 2018-03-02
Supplement: 41416_2018_25_MOESM11_ESM.pdf [file 41416_2018_25_MOESM11_ESM.pdf]

**TABLE S10: Genes set enrichment analysis revealed a significant overrepresentation of the REACTOME\_CELL\_CYCLE set in high Combo score patients compared to low Combo score patients ( $P < 0.01$ ).**

| PROBE     | GENE SYMBOL | GENE_TITLE                                                                    | RANK METRIC SCORE | RUNNING ES   | CORE ENRICHMENT |
|-----------|-------------|-------------------------------------------------------------------------------|-------------------|--------------|-----------------|
| CDT1      | CDT1        | chromatin lincensing and DNA replication factor 1                             | -0.127870694      | -0.5693202   | Yes             |
| HIST1H2BC | HIST1H2BC   | histone cluster 1, H2bc                                                       | -0.129817352      | -0.55808115  | Yes             |
| PSMA8     | PSMA8       | proteasome (prosome, macropain) subunit, alpha type, 8                        | -0.139692619      | -0.55166554  | Yes             |
| HIST1H2AE | HIST1H2AE   | histone cluster 1, H2ae                                                       | -0.145508602      | -0.5411239   | Yes             |
| MCM4      | MCM4        | MCM4 minichromosome maintenance deficient 4 ( <i>S. cerevisiae</i> )          | -0.152304724      | -0.52887     | Yes             |
| PLK4      | PLK4        | polo-like kinase 4 ( <i>Drosophila</i> )                                      | -0.152752295      | -0.51196724  | Yes             |
| CDCA8     | CDCA8       | cell division cycle associated 8                                              | -0.154042289      | -0.49468413  | Yes             |
| KIF23     | KIF23       | kinesin family member 23                                                      | -0.157216638      | -0.4788693   | Yes             |
| HIST1H2AD | HIST1H2AD   | histone cluster 1, H2ad                                                       | -0.164881527      | -0.46468836  | Yes             |
| HIST1H2BG | HIST1H2BG   | histone cluster 1, H2bg                                                       | -0.167829394      | -0.44694582  | Yes             |
| CCNB2     | CCNB2       | cyclin B2                                                                     | -0.168697953      | -0.42772296  | Yes             |
| CCNB1     | CCNB1       | cyclin B1                                                                     | -0.170906231      | -0.40893194  | Yes             |
| BUB1B     | BUB1B       | BUB1 budding uninhibited by benzimidazoles 1 homolog beta ( <i>yeast</i> )    | -0.17234768       | -0.3890534   | Yes             |
| AURKA     | AURKA       | aurora kinase A                                                               | -0.176049516      | -0.3696623   | Yes             |
| CENPA     | CENPA       | centromere protein A                                                          | -0.176667497      | -0.34950963  | Yes             |
| MCM10     | MCM10       | MCM10 minichromosome maintenance deficient 10 ( <i>S. cerevisiae</i> )        | -0.190355882      | -0.33626366  | Yes             |
| KIF20A    | KIF20A      | kinesin family member 20A                                                     | -0.206273943      | -0.3179428   | Yes             |
| HIST1H4H  | HIST1H4H    | histone cluster 1, H4h                                                        | -0.210105702      | -0.29526776  | Yes             |
| OIP5      | OIP5        | Opa interacting protein 5                                                     | -0.210215062      | -0.2707413   | Yes             |
| BIRC5     | BIRC5       | baculoviral IAP repeat-containing 5 ( <i>survivin</i> )                       | -0.215311497      | -0.24768871  | Yes             |
| GIN51     | GIN51       | GIN5 complex subunit 1 ( <i>Psf1</i> homolog)                                 | -0.225035444      | -0.22511041  | Yes             |
| NEK2      | NEK2        | NIMA ( <i>never in mitosis gene a</i> )-related kinase 2                      | -0.227829218      | -0.19898851  | Yes             |
| TYMS      | TYMS        | thymidylate synthetase                                                        | -0.23626557       | -0.17303148  | Yes             |
| HIST1H4C  | HIST1H4C    | histone cluster 1, H4c                                                        | -0.240711197      | -0.1460961   | Yes             |
| NUMA1     | NUMA1       | nuclear mitotic apparatus protein 1                                           | -0.241789743      | -0.11834538  | Yes             |
| MCM2      | MCM2        | MCM2 minichromosome maintenance deficient 2, mitotin ( <i>S. cerevisiae</i> ) | -0.245723307      | -0.08990589  | Yes             |
| HIST2H2BE | HIST2H2BE   | histone cluster 2, H2be                                                       | -0.246814266      | -0.061109282 | Yes             |
| RRM2      | RRM2        | ribonucleotide reductase M2 polypeptide                                       | -0.280034333      | -0.030964933 | Yes             |
| CHEK1     | CHEK1       | CHK1 checkpoint homolog ( <i>S. pombe</i> )                                   | -0.281156719      | 0.001838521  | Yes             |
