# Supplementary material for: DNMTi/HDACi combined epigenetic targeted treatment induces reprogramming of myeloma cells in the direction of normal plasma cells
Source: PubMed Central journal article supplement — Br J Cancer. 2018 Mar 2;118(8):1062–73. doi: 10.1038/s41416-018-0025-x (PMC5931098; doi:10.1038/s41416-018-0025-x), 2018-03-02
Supplement: 41416_2018_25_MOESM12_ESM.pdf [file 41416_2018_25_MOESM12_ESM.pdf]

**TABLE S11: Genes set enrichment analysis revealed a significant overrepresentation of the O'DONNELL\_TARGETS\_OF\_MYC\_AND\_TFRC\_DN set in high Combo score patients compared to low Combo score patients ( $P < 0.0001$ ).**

| PROBE   | GENE SYMBOL | GENE_TITLE                                                        | RANK METRIC SCORE | RUNNING ES  | CORE ENRICHMENT |
|---------|-------------|-------------------------------------------------------------------|-------------------|-------------|-----------------|
| PLK4    | PLK4        | polo-like kinase 4 (Drosophila)                                   | -0.152752295      | -0.8119321  | Yes             |
| CENPF   | CENPF       | centromere protein F, 350/400ka (mitosin)                         | -0.164142936      | -0.7546975  | Yes             |
| CCNB1   | CCNB1       | cyclin B1                                                         | -0.170906231      | -0.69136614 | Yes             |
| BUB1B   | BUB1B       | BUB1 budding uninhibited by benzimidazoles 1 homolog beta (yeast) | -0.17234768       | -0.6231421  | Yes             |
| AURKA   | AURKA       | aurora kinase A                                                   | -0.176049516      | -0.55435735 | Yes             |
| FOXM1   | FOXM1       | forkhead box M1                                                   | -0.183401987      | -0.48560828 | Yes             |
| HELLS   | HELLS       | helicase, lymphoid-specific                                       | -0.184213683      | -0.4133536  | Yes             |
| WHSC1   | WHSC1       | Wolf-Hirschhorn syndrome candidate 1                              | -0.193993777      | -0.3419894  | Yes             |
| TOP2A   | TOP2A       | topoisomerase (DNA) II alpha 170kDa                               | -0.205752715      | -0.26368114 | Yes             |
| BIRC5   | BIRC5       | baculoviral IAP repeat-containing 5 (survivin)                    | -0.215311497      | -0.18316808 | Yes             |
| DEPDC1  | DEPDC1      | DEP domain containing 1                                           | -0.234853938      | -0.09557545 | Yes             |
| DEPDC1B | DEPDC1B     | DEP domain containing 1B                                          | -0.260105789      | 0.003183346 | Yes             |
