# Supplementary material for: DNMTi/HDACi combined epigenetic targeted treatment induces reprogramming of myeloma cells in the direction of normal plasma cells
Source: PubMed Central journal article supplement — Br J Cancer. 2018 Mar 2;118(8):1062–73. doi: 10.1038/s41416-018-0025-x (PMC5931098; doi:10.1038/s41416-018-0025-x), 2018-03-02
Supplement: 41416_2018_25_MOESM13_ESM.pdf [file 41416_2018_25_MOESM13_ESM.pdf]

**TABLE S12: Genes set enrichment analysis revealed a significant overrepresentation of the DANG\_MYC\_TARGETS\_UP set in high Combo score patients compared to low Combo score patients ( $P < 0.002$ ).**

| PROBE | GENE SYMBOL | GENE_TITLE                                                        | RANK METRIC SCORE | RUNNING ES  | CORE ENRICHMENT |
|-------|-------------|-------------------------------------------------------------------|-------------------|-------------|-----------------|
| NBN   | NBN         | nibrin                                                            | -0.053661507      | -0.65107596 | Yes             |
| HSPD1 | HSPD1       | heat shock 60kDa protein 1 (chaperonin)                           | -0.069516964      | -0.6412293  | Yes             |
| CCND2 | CCND2       | cyclin D2                                                         | -0.071466759      | -0.5963849  | Yes             |
| TOP1  | TOP1        | topoisomerase (DNA) I                                             | -0.077072568      | -0.55628675 | Yes             |
| BCAT1 | BCAT1       | branched chain aminotransferase 1, cytosolic                      | -0.084116891      | -0.5140258  | Yes             |
| TP53  | TP53        | tumor protein p53 (Li-Fraumeni syndrome)                          | -0.092572831      | -0.46930388 | Yes             |
| MGST1 | MGST1       | microsomal glutathione S-transferase 1                            | -0.097474456      | -0.41094923 | Yes             |
| EMP1  | EMP1        | epithelial membrane protein 1                                     | -0.149763241      | -0.37062183 | Yes             |
| CCNB1 | CCNB1       | cyclin B1                                                         | -0.170906231      | -0.2681044  | Yes             |
| UCHL1 | UCHL1       | ubiquitin carboxyl-terminal esterase L1 (ubiquitin thiolesterase) | -0.200972006      | -0.14425816 | Yes             |
| TYMS  | TYMS        | thymidylate synthetase                                            | -0.23626557       | 0.007501727 | Yes             |
