# Supplementary material for: DNMTi/HDACi combined epigenetic targeted treatment induces reprogramming of myeloma cells in the direction of normal plasma cells
Source: PubMed Central journal article supplement — Br J Cancer. 2018 Mar 2;118(8):1062–73. doi: 10.1038/s41416-018-0025-x (PMC5931098; doi:10.1038/s41416-018-0025-x), 2018-03-02
Supplement: 41416_2018_25_MOESM14_ESM.pdf [file 41416_2018_25_MOESM14_ESM.pdf]

**TABLE S13: Genes set enrichment analysis revealed a significant overrepresentation of the DANG\_MYC\_TARGETS\_UP set in high Combo score patients compared to low Combo score patients ( $P < 0.0001$ ).**

| PROBE     | GENE SYMBOL | GENE_TITLE                                  | RANK METRIC SCORE | RUNNING ES  | CORE ENRICHMENT |
|-----------|-------------|---------------------------------------------|-------------------|-------------|-----------------|
| POU2F1    | POU2F1      | POU domain, class 2, transcription factor 1 | -0.115852885      | -0.7454971  | Yes             |
| HIST1H2BC | HIST1H2BC   | histone cluster 1, H2bc                     | -0.129817352      | -0.7048022  | Yes             |
| PAPOLA    | PAPOLA      | poly(A) polymerase alpha                    | -0.145032734      | -0.65668285 | Yes             |
| HIST1H2AE | HIST1H2AE   | histone cluster 1, H2ae                     | -0.145508602      | -0.5922052  | Yes             |
| HIST1H3H  | HIST1H3H    | histone cluster 1, H3h                      | -0.146450803      | -0.527765   | Yes             |
| HIST1H2AD | HIST1H2AD   | histone cluster 1, H2ad                     | -0.164881527      | -0.46948564 | Yes             |
| HIST1H2BG | HIST1H2BG   | histone cluster 1, H2bg                     | -0.167829394      | -0.39693668 | Yes             |
| HIST1H4H  | HIST1H4H    | histone cluster 1, H4h                      | -0.210105702      | -0.32521307 | Yes             |
| HIST1H4C  | HIST1H4C    | histone cluster 1, H4c                      | -0.240711197      | -0.22855622 | Yes             |
| HIST2H2BE | HIST2H2BE   | histone cluster 2, H2be                     | -0.246814266      | -0.12032529 | Yes             |
| HIST1H3D  | HIST1H3D    | histone cluster 1, H3d                      | -0.281806648      | 0.001592003 | Yes             |
